# Supplementary material
Source: Royal Society of Chemistry journal article supplement (doi:10.1039/d6nj00643d)
Supplement: d6nj00643d1.pdf [file d6nj00643d1.pdf]

## **SUPPORTING INFORMATION**

---

### **A new, comprehensive insight on the competition between (4+2) and (2+4) cycloaddition schemes and molecular mechanism of Diels-Alder reaction of 2-nitrofurane with isoprene**

**Karolina Kula\* and Radomir Jasiński**

Cracow University of Technology, Faculty of Chemical Engineering and Technology, Warszawska 24,  
31-155 Cracow, Poland;

\*Correspondence address: karolina.kula@pk.edu.pl

---

A new, comprehensive insight on the competition between (4+2) and (2+4) cycloaddition schemes and molecular mechanism of Diels-Alder reaction of 2-nitrofuran with isoprene

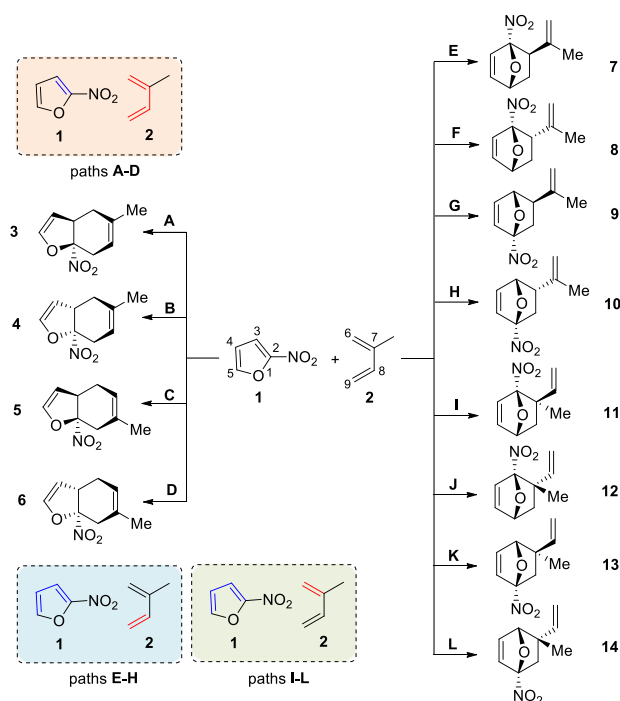

**Scheme S1.** Theoretically possible chemo-, regio-, and stereoselective pathways of the DA between 2-nitrofuran (1) and isoprene (2).

**Table S1.**  $\omega$ B97XD/6-311+G(d) key parameters of the critical structures of the DA between 2-nitrofuran (1) and isoprene (2) in benzene (PCM).

| Structure       | Interatomic distances [Å] |              |              |              |              |              |              |              | I'   | I''  | ΔI   | GEDT [e] |
|-----------------|---------------------------|--------------|--------------|--------------|--------------|--------------|--------------|--------------|------|------|------|----------|
| <b>path A-D</b> | <b>C2-C3</b>              | <b>C2-C6</b> | <b>C3-C6</b> | <b>C6-C7</b> | <b>C7-C8</b> | <b>C8-C9</b> | <b>C9-C2</b> | <b>C9-C3</b> |      |      |      |          |
| MC <sub>A</sub> | 1.357                     |              | 3.523        | 1.335        | 1.477        | 1.331        | 3.572        |              |      |      |      | 0.00     |
| TS <sub>A</sub> | 1.419                     |              | 2.244        | 1.378        | 1.409        | 1.379        | 2.156        |              | 0.54 | 0.59 | 0.04 | 0.14     |
| 3               | 1.554                     |              | 1.542        | 1.510        | 1.332        | 1.506        | 1.526        |              |      |      |      |          |
| MC <sub>B</sub> | 1.357                     |              | 3.624        | 1.335        | 1.478        | 1.332        | 3.232        |              |      |      |      | 0.00     |
| TS <sub>B</sub> | 1.415                     |              | 2.110        | 1.386        | 1.411        | 1.370        | 2.313        |              | 0.63 | 0.49 | 0.14 | 0.08     |
| 4               | 1.545                     |              | 1.538        | 1.510        | 1.331        | 1.505        | 1.533        |              |      |      |      |          |
| MC <sub>C</sub> | 1.357                     | 3.562        |              | 1.334        | 1.478        | 1.332        |              | 3.577        |      |      |      | 0.00     |
| TS <sub>C</sub> | 1.417                     | 2.097        |              | 1.388        | 1.409        | 1.372        |              | 2.328        | 0.62 | 0.49 | 0.13 | 0.02     |
| 5               | 1.553                     | 1.524        |              | 1.512        | 1.332        | 1.505        |              | 1.544        |      |      |      |          |
| MC <sub>D</sub> | 1.357                     | 3.206        |              | 1.335        | 1.478        | 1.332        |              | 3.750        |      |      |      | 0.00     |
| TS <sub>D</sub> | 1.415                     | 2.175        |              | 1.382        | 1.408        | 1.379        |              | 2.212        | 0.58 | 0.56 | 0.01 | 0.01     |
| 6               | 1.548                     | 1.530        |              | 1.511        | 1.331        | 1.504        |              | 1.540        |      |      |      |          |
| <b>path E-H</b> | <b>C2-C3</b>              | <b>C2-C8</b> | <b>C2-C9</b> | <b>C3-C4</b> | <b>C4-C5</b> | <b>C5-C8</b> | <b>C5-C9</b> | <b>C8-C9</b> |      |      |      |          |
| MC <sub>E</sub> | 1.358                     | 3.376        |              | 1.421        | 1.360        |              | 3.337        | 1.333        |      |      |      | 0.00     |
| TS <sub>E</sub> | 1.404                     | 2.408        |              | 1.369        | 1.428        |              | 1.980        | 1.402        | 0.48 | 0.73 | 0.25 | 0.01     |
| 7               | 1.516                     | 1.581        |              | 1.328        | 1.519        |              | 1.556        | 1.554        |      |      |      |          |
| MC <sub>F</sub> | 1.358                     | 3.266        |              | 1.421        | 1.361        |              | 3.371        | 1.334        |      |      |      | 0.00     |
| TS <sub>F</sub> | 1.404                     | 2.351        |              | 1.370        | 1.425        |              | 1.993        | 1.401        | 0.51 | 0.72 | 0.21 | 0.12     |
| 8               | 1.511                     | 1.577        |              | 1.329        | 1.518        |              | 1.558        | 1.552        |      |      |      |          |
| MC <sub>G</sub> | 1.358                     |              | 3.907        | 1.421        | 1.361        | 4.416        |              | 1.331        |      |      |      | 0.00     |
| TS <sub>G</sub> | 1.418                     |              | 2.006        | 1.371        | 1.410        | 2.363        |              | 1.397        | 0.72 | 0.50 | 0.22 | 0.06     |
| 9               | 1.518                     |              | 1.564        | 1.328        | 1.519        | 1.576        |              | 1.550        |      |      |      |          |
| MC <sub>H</sub> | 1.358                     |              | 3.225        | 1.421        | 1.360        | 3.794        |              | 1.332        |      |      |      | 0.00     |
| TS <sub>H</sub> | 1.419                     |              | 1.999        | 1.373        | 1.403        | 2.342        |              | 1.398        | 0.71 | 0.51 | 0.20 | 0.07     |
| 10              | 1.517                     |              | 1.554        | 1.328        | 1.517        | 1.575        |              | 1.549        |      |      |      |          |
| <b>path I-L</b> | <b>C2-C3</b>              | <b>C2-C6</b> | <b>C2-C7</b> | <b>C3-C4</b> | <b>C4-C5</b> | <b>C5-C6</b> | <b>C5-C7</b> | <b>C6-C7</b> |      |      |      |          |
| MC <sub>I</sub> | 1.358                     |              | 3.306        | 1.420        | 1.361        | 3.312        |              | 1.337        |      |      |      | 0.00     |
| TS <sub>I</sub> | 1.402                     |              | 2.500        | 1.370        | 1.431        | 1.944        |              | 1.408        | 0.43 | 0.75 | 0.32 | 0.04     |
| 11              | 1.515                     |              | 1.594        | 1.328        | 1.518        | 1.554        |              | 1.564        |      |      |      |          |
| MC <sub>J</sub> | 1.358                     |              | 3.361        | 1.421        | 1.361        | 3.329        |              | 1.337        |      |      |      | 0.00     |
| TS <sub>J</sub> | 1.403                     |              | 2.495        | 1.369        | 1.431        | 1.945        |              | 1.408        | 0.43 | 0.75 | 0.31 | 0.07     |
| 12              | 1.516                     |              | 1.593        | 1.328        | 1.519        | 1.553        |              | 1.566        |      |      |      |          |
| MC <sub>K</sub> | 1.357                     | 3.435        |              | 1.423        | 1.360        |              | 3.901        | 1.335        |      |      |      | 0.00     |
| TS <sub>K</sub> | 1.419                     | 2.003        |              | 1.372        | 1.406        |              | 2.414        | 1.402        | 0.71 | 0.48 | 0.23 | 0.11     |
| 13              | 1.518                     | 1.554        |              | 1.328        | 1.519        |              | 1.585        | 1.556        |      |      |      |          |
| MC <sub>L</sub> | 1.357                     | 3.562        |              | 1.423        | 1.360        |              | 4.251        | 1.334        |      |      |      | 0.00     |
| TS <sub>L</sub> | 1.421                     | 1.970        |              | 1.374        | 1.398        |              | 2.405        | 1.404        | 0.73 | 0.48 | 0.25 | 0.06     |
| 14              | 1.517                     | 1.553        |              | 1.328        | 1.518        |              | 1.579        | 1.555        |      |      |      |          |

**A new, comprehensive insight on the competition between (4+2) and (2+4) cycloaddition schemes and molecular mechanism of Diels-Alder reaction of 2-nitrofurane with isoprene**

**Table S2.** Thermochemistry and cartesian coordinates of 2-nitrofurane (1)  
( $\omega$ B97XD/6-311+G(d), in benzene solution (PCM)).

|                                               |                             |                                                                                                                    |
|-----------------------------------------------|-----------------------------|--------------------------------------------------------------------------------------------------------------------|
| Zero-point correction =                       | 0.073638 (Hartree/Particle) | 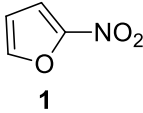 <p align="center"><b>1</b></p> |
| Thermal correction to Energy =                | 0.079629 (Hartree/Particle) |                                                                                                                    |
| Thermal correction to Enthalpy =              | 0.080574 (Hartree/Particle) |                                                                                                                    |
| Thermal correction to Gibbs Free Energy =     | 0.042949 (Hartree/Particle) |                                                                                                                    |
| Sum of electronic and zero-point Energies =   | -434.418 (Hartree/Particle) |                                                                                                                    |
| Sum of electronic and thermal Energies =      | -434.412 (Hartree/Particle) |                                                                                                                    |
| Sum of electronic and thermal Enthalpies =    | -434.411 (Hartree/Particle) |                                                                                                                    |
| Sum of electronic and thermal Free Energies = | -434.449 (Hartree/Particle) |                                                                                                                    |

| Center | Coordinates (Angstroms) |             |             |
|--------|-------------------------|-------------|-------------|
|        | X                       | Y           | Z           |
| C      | 1.99438200              | -0.71780900 | 0.00000400  |
| C      | 2.13901700              | 0.63473200  | -0.00002900 |
| C      | 0.82156000              | 1.17286900  | 0.00003600  |
| C      | 0.00577300              | 0.08767000  | 0.00001600  |
| O      | 0.69213200              | -1.06388800 | -0.00000300 |
| H      | 2.69320900              | -1.53831500 | -0.00000800 |
| H      | 3.06876800              | 1.18158800  | -0.00006100 |
| H      | 0.51518400              | 2.20622500  | 0.00005300  |
| N      | -1.42008900             | -0.00155300 | 0.00002200  |
| O      | -1.92759600             | -1.10578600 | -0.00000500 |
| O      | -2.02715200             | 1.05675000  | -0.00003000 |

**Table S3.** Thermochemistry and cartesian coordinates of isoprene (2)  
( $\omega$ B97XD/6-311+G(d), in benzene solution (PCM)).

|                                               |                             |                                                                                                                      |
|-----------------------------------------------|-----------------------------|----------------------------------------------------------------------------------------------------------------------|
| Zero-point correction =                       | 0.113657 (Hartree/Particle) |  <p align="center"><b>2</b></p> |
| Thermal correction to Energy =                | 0.119662 (Hartree/Particle) |                                                                                                                      |
| Thermal correction to Enthalpy =              | 0.120607 (Hartree/Particle) |                                                                                                                      |
| Thermal correction to Gibbs Free Energy =     | 0.084789 (Hartree/Particle) |                                                                                                                      |
| Sum of electronic and zero-point Energies =   | -195.163 (Hartree/Particle) |                                                                                                                      |
| Sum of electronic and thermal Energies =      | -195.157 (Hartree/Particle) |                                                                                                                      |
| Sum of electronic and thermal Enthalpies =    | -195.156 (Hartree/Particle) |                                                                                                                      |
| Sum of electronic and thermal Free Energies = | -195.192 (Hartree/Particle) |                                                                                                                      |

| Center | Coordinates (Angstroms) |              |              |
|--------|-------------------------|--------------|--------------|
|        | X                       | Y            | Z            |
| C      | -2.016955000            | -0.101522000 | 0.209816000  |
| H      | -2.944018000            | -0.629529000 | 0.011834000  |
| C      | 0.598177000             | 1.438330000  | -0.093424000 |
| H      | 1.562765000             | 1.908052000  | 0.074228000  |
| H      | -0.240361000            | 2.095960000  | -0.299677000 |
| H      | -2.078895000            | 0.790881000  | 0.826201000  |
| C      | -0.855178000            | -0.539207000 | -0.271164000 |
| C      | 0.456079000             | 0.111636000  | -0.065632000 |
| C      | 1.617366000             | -0.821244000 | 0.153896000  |
| H      | 1.730414000             | -1.504760000 | -0.694526000 |
| H      | 2.555501000             | -0.277519000 | 0.279208000  |
| H      | 1.456948000             | -1.441891000 | 1.041393000  |
| H      | -0.839293000            | -1.469148000 | -0.839612000 |

**A new, comprehensive insight on the competition between (4+2) and (2+4) cycloaddition schemes  
and molecular mechanism of Diels-Alder reaction of 2-nitrofurane with isoprene**

**Table S4.** Thermochemistry and cartesian coordinates of **MC** of product **(3)** (path A)  
( $\omega$ B97XD/6-311+G(d), in benzene solution (PCM)).

| Zero-point correction =                       | 0.188263 (Hartree/Particle)   | 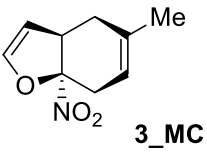 <p align="center"><b>3_MC</b></p> |             |
|-----------------------------------------------|-------------------------------|-----------------------------------------------------------------------------------------------------------------------|-------------|
| Thermal correction to Energy =                | 0.20223 (Hartree/Particle)    |                                                                                                                       |             |
| Thermal correction to Enthalpy =              | 0.203174 (Hartree/Particle)   |                                                                                                                       |             |
| Thermal correction to Gibbs Free Energy =     | 0.144659 (Hartree/Particle)   |                                                                                                                       |             |
| Sum of electronic and zero-point Energies =   | -629.58941 (Hartree/Particle) |                                                                                                                       |             |
| Sum of electronic and thermal Energies =      | -629.57545 (Hartree/Particle) |                                                                                                                       |             |
| Sum of electronic and thermal Enthalpies =    | -629.5745 (Hartree/Particle)  |                                                                                                                       |             |
| Sum of electronic and thermal Free Energies = | -629.63302 (Hartree/Particle) |                                                                                                                       |             |
| -----                                         |                               |                                                                                                                       |             |
| Center                                        | Coordinates (Angstroms)       |                                                                                                                       |             |
|                                               | X                             | Y                                                                                                                     | Z           |
| -----                                         |                               |                                                                                                                       |             |
| C                                             | -0.41732100                   | 2.35178500                                                                                                            | 0.52398700  |
| H                                             | 0.11307900                    | 3.21021600                                                                                                            | 0.90544200  |
| C                                             | -0.58976400                   | 1.09097300                                                                                                            | 1.15941100  |
| H                                             | -0.21313900                   | 0.75702200                                                                                                            | 2.11160500  |
| C                                             | -1.32334900                   | 0.36066900                                                                                                            | 0.28220100  |
| C                                             | -1.06113000                   | 2.26357400                                                                                                            | -0.67148400 |
| H                                             | -1.21123500                   | 2.95478400                                                                                                            | -1.48481000 |
| C                                             | 0.94854700                    | -1.67131800                                                                                                           | -1.57991300 |
| H                                             | 0.29605400                    | -1.71424400                                                                                                           | -2.44532900 |
| C                                             | 2.16708700                    | -1.10246400                                                                                                           | 1.14802600  |
| H                                             | 2.82196700                    | -0.96796200                                                                                                           | 2.00393900  |
| O                                             | -1.62145900                   | 1.04890200                                                                                                            | -0.83021500 |
| N                                             | -1.75974400                   | -0.99495800                                                                                                           | 0.34711000  |
| O                                             | -1.44690600                   | -1.61651100                                                                                                           | 1.34968500  |
| O                                             | -2.40151200                   | -1.43955300                                                                                                           | -0.58483200 |
| H                                             | 1.41105000                    | -1.87744200                                                                                                           | 1.22423800  |
| H                                             | 1.21109600                    | -2.61641100                                                                                                           | -1.11344300 |
| C                                             | 1.40621100                    | -0.50979000                                                                                                           | -1.11732900 |
| C                                             | 2.27564600                    | -0.33164700                                                                                                           | 0.06390500  |
| C                                             | 3.25724200                    | 0.80579300                                                                                                            | -0.02331200 |
| H                                             | 2.72844800                    | 1.75512100                                                                                                            | -0.16738300 |
| H                                             | 3.86500800                    | 0.88768200                                                                                                            | 0.87971500  |
| H                                             | 3.92753200                    | 0.68362300                                                                                                            | -0.88012500 |
| H                                             | 1.14835800                    | 0.40415300                                                                                                            | -1.65367000 |
| -----                                         |                               |                                                                                                                       |             |

**A new, comprehensive insight on the competition between (4+2) and (2+4) cycloaddition schemes  
and molecular mechanism of Diels-Alder reaction of 2-nitrofurán with isoprene**

**Table S5.** Thermochemistry and cartesian coordinates of **TS** of product **(3)** (path A)  
( $\omega$ B97XD/6-311+G(d), in benzene solution (PCM)).

| Zero-point correction =                       | 0.189464 (Hartree/Particle) | 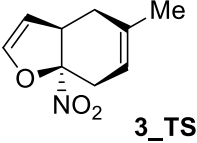 <p align="right"><b>3_TS</b></p> |             |
|-----------------------------------------------|-----------------------------|----------------------------------------------------------------------------------------------------------------------|-------------|
| Thermal correction to Energy =                | 0.201329 (Hartree/Particle) |                                                                                                                      |             |
| Thermal correction to Enthalpy =              | 0.202273 (Hartree/Particle) |                                                                                                                      |             |
| Thermal correction to Gibbs Free Energy =     | 0.151277 (Hartree/Particle) |                                                                                                                      |             |
| Sum of electronic and zero-point Energies =   | -629.547 (Hartree/Particle) |                                                                                                                      |             |
| Sum of electronic and thermal Energies =      | -629.535 (Hartree/Particle) |                                                                                                                      |             |
| Sum of electronic and thermal Enthalpies =    | -629.534 (Hartree/Particle) |                                                                                                                      |             |
| Sum of electronic and thermal Free Energies = | -629.585 (Hartree/Particle) |                                                                                                                      |             |
| Center                                        | Coordinates (Angstroms)     |                                                                                                                      |             |
|                                               | X                           | Y                                                                                                                    | Z           |
| C                                             | -0.56891300                 | 1.75545600                                                                                                           | -0.87952000 |
| H                                             | -1.29677600                 | 2.26990900                                                                                                           | -1.48783100 |
| C                                             | 0.06844500                  | 0.49884000                                                                                                           | -1.17627900 |
| H                                             | 0.31388300                  | 0.13662500                                                                                                           | -2.16204700 |
| C                                             | 0.88255900                  | 0.25678500                                                                                                           | -0.03986200 |
| C                                             | -0.11417300                 | 2.15056800                                                                                                           | 0.32600300  |
| H                                             | -0.33718300                 | 3.00798600                                                                                                           | 0.94169000  |
| C                                             | 0.01600400                  | -1.28994300                                                                                                          | 1.18776200  |
| H                                             | 0.62579800                  | -1.23539000                                                                                                          | 2.08444500  |
| C                                             | -1.53494500                 | -1.07082800                                                                                                          | -1.14646700 |
| H                                             | -2.10102300                 | -0.87931000                                                                                                          | -2.05341900 |
| O                                             | 0.84208200                  | 1.32188000                                                                                                           | 0.81725500  |
| N                                             | 2.17341500                  | -0.37721300                                                                                                          | -0.15816600 |
| O                                             | 2.25980800                  | -1.26303400                                                                                                          | -0.99796300 |
| O                                             | 3.06814000                  | -0.03693500                                                                                                          | 0.58949600  |
| H                                             | -0.72613000                 | -1.78242200                                                                                                          | -1.25848600 |
| H                                             | 0.34871200                  | -2.01971100                                                                                                          | 0.45707800  |
| C                                             | -1.30720500                 | -0.90396900                                                                                                          | 1.24366400  |
| C                                             | -2.09853900                 | -0.80140200                                                                                                          | 0.08216600  |
| C                                             | -3.41724900                 | -0.08140700                                                                                                          | 0.16527400  |
| H                                             | -3.25130700                 | 1.00297300                                                                                                           | 0.16199200  |
| H                                             | -4.06914700                 | -0.32307800                                                                                                          | -0.67608400 |
| H                                             | -3.94635800                 | -0.32655800                                                                                                          | 1.08908800  |
| H                                             | -1.69050700                 | -0.47041900                                                                                                          | 2.16399200  |

**A new, comprehensive insight on the competition between (4+2) and (2+4) cycloaddition schemes  
and molecular mechanism of Diels-Alder reaction of 2-nitrofurán with isoprene**

**Table S6.** Thermochemistry and cartesian coordinates of **PR** of product (**3**) (path A)  
( $\omega$ B97XD/6-311+G(d), in benzene solution (PCM)).

|                                               |                             |
|-----------------------------------------------|-----------------------------|
| Zero-point correction =                       | 0.194555 (Hartree/Particle) |
| Thermal correction to Energy =                | 0.205722 (Hartree/Particle) |
| Thermal correction to Enthalpy =              | 0.206666 (Hartree/Particle) |
| Thermal correction to Gibbs Free Energy =     | 0.157085 (Hartree/Particle) |
| Sum of electronic and zero-point Energies =   | -629.639 (Hartree/Particle) |
| Sum of electronic and thermal Energies =      | -629.628 (Hartree/Particle) |
| Sum of electronic and thermal Enthalpies =    | -629.627 (Hartree/Particle) |
| Sum of electronic and thermal Free Energies = | -629.677 (Hartree/Particle) |

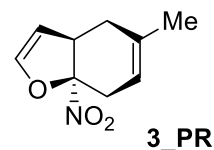

| Center | Coordinates (Angstroms) |             |             |
|--------|-------------------------|-------------|-------------|
|        | X                       | Y           | Z           |
| C      | 0.09151300              | 1.92900800  | 0.65384600  |
| H      | 0.45724500              | 2.71805400  | 1.29420700  |
| C      | 0.04424700              | 0.46949400  | 1.02922000  |
| H      | -0.56704700             | 0.30613900  | 1.91913500  |
| C      | -0.66659900             | -0.11784000 | -0.22102000 |
| C      | -0.37373000             | 2.07405800  | -0.57661100 |
| H      | -0.48971900             | 2.94788100  | -1.20042500 |
| C      | 0.01004400              | -1.33740400 | -0.83922700 |
| H      | -0.47123400             | -1.55868400 | -1.79391300 |
| C      | 1.42807800              | -0.16734200 | 1.26859800  |
| H      | 2.01611700              | 0.49756100  | 1.90718200  |
| O      | -0.76723200             | 0.89998900  | -1.17060300 |
| N      | -2.11008500             | -0.52095100 | 0.18006800  |
| O      | -2.19339400             | -1.38914900 | 1.02703600  |
| O      | -3.04284400             | 0.02264800  | -0.35761000 |
| H      | 1.29215100              | -1.09755400 | 1.83431400  |
| H      | -0.14710200             | -2.19685300 | -0.18009800 |
| C      | 1.47696100              | -1.04167300 | -1.00610600 |
| C      | 2.16206800              | -0.47351000 | -0.01549600 |
| C      | 3.61934700              | -0.13773500 | -0.09056300 |
| H      | 3.77336000              | 0.93937900  | 0.03622800  |
| H      | 4.17546800              | -0.63347800 | 0.71263500  |
| H      | 4.05735500              | -0.43748800 | -1.04486800 |
| H      | 1.95018400              | -1.28854700 | -1.95129300 |

**A new, comprehensive insight on the competition between (4+2) and (2+4) cycloaddition schemes  
and molecular mechanism of Diels-Alder reaction of 2-nitrofurán with isoprene**

**Table S7.** Thermochemistry and cartesian coordinates of **MC** of product (**4**) (path B)  
( $\omega$ B97XD/6-311+G(d), in benzene solution (PCM)).

| Zero-point correction =                       | 0.188554 (Hartree/Particle) | 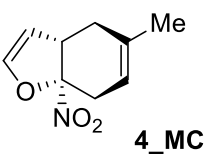 <p align="center"><b>4_MC</b></p> |              |
|-----------------------------------------------|-----------------------------|-----------------------------------------------------------------------------------------------------------------------|--------------|
| Thermal correction to Energy =                | 0.202398 (Hartree/Particle) |                                                                                                                       |              |
| Thermal correction to Enthalpy =              | 0.203342 (Hartree/Particle) |                                                                                                                       |              |
| Thermal correction to Gibbs Free Energy =     | 0.145595 (Hartree/Particle) |                                                                                                                       |              |
| Sum of electronic and zero-point Energies =   | -629.589 (Hartree/Particle) |                                                                                                                       |              |
| Sum of electronic and thermal Energies =      | -629.576 (Hartree/Particle) |                                                                                                                       |              |
| Sum of electronic and thermal Enthalpies =    | -629.575 (Hartree/Particle) |                                                                                                                       |              |
| Sum of electronic and thermal Free Energies = | -629.632 (Hartree/Particle) |                                                                                                                       |              |
| Center                                        | Coordinates (Angstroms)     |                                                                                                                       |              |
|                                               | X                           | Y                                                                                                                     | Z            |
| C                                             | -1.757720000                | -0.501194000                                                                                                          | 1.258201000  |
| C                                             | -2.401781000                | 0.133323000                                                                                                           | 0.089417000  |
| C                                             | 1.083013000                 | 2.111154000                                                                                                           | -0.821660000 |
| H                                             | 0.770604000                 | 3.050230000                                                                                                           | -1.250505000 |
| C                                             | 0.670085000                 | 0.806551000                                                                                                           | -1.208859000 |
| H                                             | -0.025160000                | 0.521863000                                                                                                           | -1.981059000 |
| C                                             | 1.333998000                 | -0.028153000                                                                                                          | -0.370021000 |
| C                                             | 1.953598000                 | 1.941497000                                                                                                           | 0.209534000  |
| H                                             | 2.524301000                 | 2.624230000                                                                                                           | 0.817626000  |
| C                                             | -0.829371000                | 0.062438000                                                                                                           | 2.028771000  |
| H                                             | -0.461495000                | 1.067131000                                                                                                           | 1.836062000  |
| H                                             | -0.395609000                | -0.467074000                                                                                                          | 2.870210000  |
| C                                             | -2.669212000                | 1.440469000                                                                                                           | 0.048270000  |
| H                                             | -3.127773000                | 1.896384000                                                                                                           | -0.824291000 |
| H                                             | -2.457490000                | 2.093225000                                                                                                           | 0.889298000  |
| O                                             | 2.116175000                 | 0.634435000                                                                                                           | 0.494946000  |
| N                                             | 1.282006000                 | -1.447306000                                                                                                          | -0.243772000 |
| O                                             | 0.568196000                 | -2.035972000                                                                                                          | -1.040305000 |
| O                                             | 1.933629000                 | -1.972649000                                                                                                          | 0.637099000  |
| H                                             | -2.053442000                | -1.529651000                                                                                                          | 1.462408000  |
| C                                             | -2.746562000                | -0.796272000                                                                                                          | -1.043213000 |
| H                                             | -1.855793000                | -1.320375000                                                                                                          | -1.402731000 |
| H                                             | -3.448959000                | -1.566796000                                                                                                          | -0.707647000 |
| H                                             | -3.203524000                | -0.263424000                                                                                                          | -1.879537000 |

**A new, comprehensive insight on the competition between (4+2) and (2+4) cycloaddition schemes  
and molecular mechanism of Diels-Alder reaction of 2-nitrofurán with isoprene**

**Table S8.** Thermochemistry and cartesian coordinates of **TS** of product **(4)** (path B)  
( $\omega$ B97XD/6-311+G(d), in benzene solution (PCM)).

| Zero-point correction =                       | 0.189600 (Hartree/Particle) | 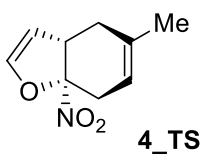 <p align="center"><b>4_TS</b></p> |              |
|-----------------------------------------------|-----------------------------|-----------------------------------------------------------------------------------------------------------------------|--------------|
| Thermal correction to Energy =                | 0.201471 (Hartree/Particle) |                                                                                                                       |              |
| Thermal correction to Enthalpy =              | 0.202415 (Hartree/Particle) |                                                                                                                       |              |
| Thermal correction to Gibbs Free Energy =     | 0.151451 (Hartree/Particle) |                                                                                                                       |              |
| Sum of electronic and zero-point Energies =   | -629.547 (Hartree/Particle) |                                                                                                                       |              |
| Sum of electronic and thermal Energies =      | -629.535 (Hartree/Particle) |                                                                                                                       |              |
| Sum of electronic and thermal Enthalpies =    | -629.534 (Hartree/Particle) |                                                                                                                       |              |
| Sum of electronic and thermal Free Energies = | -629.585 (Hartree/Particle) |                                                                                                                       |              |
| Center                                        | Coordinates (Angstroms)     |                                                                                                                       |              |
|                                               | X                           | Y                                                                                                                     | Z            |
| C                                             | -1.604634000                | -0.531862000                                                                                                          | 1.200543000  |
| C                                             | -2.116527000                | 0.437478000                                                                                                           | 0.312176000  |
| C                                             | 1.310349000                 | 2.017395000                                                                                                           | -0.641056000 |
| H                                             | 1.238324000                 | 3.017926000                                                                                                           | -1.039249000 |
| C                                             | 0.356697000                 | 0.937316000                                                                                                           | -0.837292000 |
| H                                             | -0.174574000                | 0.756947000                                                                                                           | -1.759796000 |
| C                                             | 0.921136000                 | -0.125230000                                                                                                          | -0.092232000 |
| C                                             | 2.277489000                 | 1.550310000                                                                                                           | 0.167614000  |
| H                                             | 3.149997000                 | 2.012384000                                                                                                           | 0.602517000  |
| C                                             | -0.380639000                | -0.395346000                                                                                                          | 1.799928000  |
| H                                             | 0.053501000                 | 0.573694000                                                                                                           | 2.017822000  |
| H                                             | 0.058400000                 | -1.224341000                                                                                                          | 2.345536000  |
| C                                             | -1.406640000                | 1.610407000                                                                                                           | 0.106706000  |
| H                                             | -1.771738000                | 2.329692000                                                                                                           | -0.621042000 |
| H                                             | -0.833512000                | 2.048845000                                                                                                           | 0.913152000  |
| O                                             | 2.106986000                 | 0.237471000                                                                                                           | 0.476883000  |
| N                                             | 0.799757000                 | -1.493581000                                                                                                          | -0.471417000 |
| O                                             | -0.186263000                | -1.779503000                                                                                                          | -1.141826000 |
| O                                             | 1.638620000                 | -2.293608000                                                                                                          | -0.091852000 |
| H                                             | -2.085948000                | -1.505806000                                                                                                          | 1.218520000  |
| C                                             | -3.223369000                | 0.051376000                                                                                                           | -0.629395000 |
| H                                             | -2.801548000                | -0.417904000                                                                                                          | -1.526087000 |
| H                                             | -3.897227000                | -0.677026000                                                                                                          | -0.173294000 |
| H                                             | -3.811886000                | 0.914714000                                                                                                           | -0.945752000 |

**A new, comprehensive insight on the competition between (4+2) and (2+4) cycloaddition schemes  
and molecular mechanism of Diels-Alder reaction of 2-nitrofurán with isoprene**

**Table S9.** Thermochemistry and cartesian coordinates of **PR** of product **(4)** (path B)  
( $\omega$ B97XD/6-311+G(d), in benzene solution (PCM)).

| Zero-point correction =                       | 0.194396 (Hartree/Particle) | 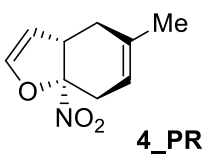 <p align="center"><b>4_PR</b></p> |              |
|-----------------------------------------------|-----------------------------|-----------------------------------------------------------------------------------------------------------------------|--------------|
| Thermal correction to Energy =                | 0.205628 (Hartree/Particle) |                                                                                                                       |              |
| Thermal correction to Enthalpy =              | 0.206572 (Hartree/Particle) |                                                                                                                       |              |
| Thermal correction to Gibbs Free Energy =     | 0.156632 (Hartree/Particle) |                                                                                                                       |              |
| Sum of electronic and zero-point Energies =   | -629.638 (Hartree/Particle) |                                                                                                                       |              |
| Sum of electronic and thermal Energies =      | -629.627 (Hartree/Particle) |                                                                                                                       |              |
| Sum of electronic and thermal Enthalpies =    | -629.626 (Hartree/Particle) |                                                                                                                       |              |
| Sum of electronic and thermal Free Energies = | -629.676 (Hartree/Particle) |                                                                                                                       |              |
| Coordinates (Angstroms)                       |                             |                                                                                                                       |              |
| Center                                        | X                           | Y                                                                                                                     | Z            |
| C                                             | 1.673706000                 | 0.978842000                                                                                                           | 0.818381000  |
| C                                             | 2.257240000                 | 0.013237000                                                                                                           | 0.111716000  |
| C                                             | -0.948360000                | -1.983439000                                                                                                          | -0.688526000 |
| H                                             | -0.917209000                | -2.817776000                                                                                                          | -1.373133000 |
| C                                             | 0.033899000                 | -0.840937000                                                                                                          | -0.661605000 |
| H                                             | 0.120247000                 | -0.332409000                                                                                                          | -1.623327000 |
| C                                             | -0.652770000                | 0.092683000                                                                                                           | 0.359415000  |
| C                                             | -1.815353000                | -1.814263000                                                                                                          | 0.298324000  |
| H                                             | -2.644125000                | -2.416674000                                                                                                          | 0.639018000  |
| C                                             | 0.271851000                 | 0.821450000                                                                                                           | 1.341829000  |
| H                                             | 0.275473000                 | 0.205317000                                                                                                           | 2.247430000  |
| H                                             | -0.160544000                | 1.781551000                                                                                                           | 1.629186000  |
| C                                             | 1.449989000                 | -1.224432000                                                                                                          | -0.200307000 |
| H                                             | 1.929719000                 | -1.822803000                                                                                                          | -0.979579000 |
| H                                             | 1.380616000                 | -1.866631000                                                                                                          | 0.687281000  |
| O                                             | -1.606130000                | -0.668076000                                                                                                          | 1.034392000  |
| N                                             | -1.429110000                | 1.183345000                                                                                                           | -0.443580000 |
| O                                             | -0.747676000                | 1.913057000                                                                                                           | -1.134473000 |
| O                                             | -2.627460000                | 1.255375000                                                                                                           | -0.320013000 |
| H                                             | 2.203473000                 | 1.895251000                                                                                                           | 1.059551000  |
| C                                             | 3.660055000                 | 0.089186000                                                                                                           | -0.407633000 |
| H                                             | 3.672641000                 | 0.028795000                                                                                                           | -1.501509000 |
| H                                             | 4.154183000                 | 1.016434000                                                                                                           | -0.110435000 |
| H                                             | 4.257896000                 | -0.751276000                                                                                                          | -0.038234000 |

**A new, comprehensive insight on the competition between (4+2) and (2+4) cycloaddition schemes  
and molecular mechanism of Diels-Alder reaction of 2-nitrofurane with isoprene**

**Table S10.** Thermochemistry and cartesian coordinates of MC of product (5) (path C)  
( $\omega$ B97XD/6-311+G(d), in benzene solution (PCM)).

| Zero-point correction =                       | 0.188661 (Hartree/Particle) | 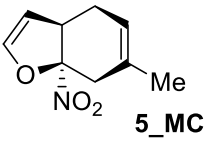 <p align="center"><b>5_MC</b></p> |             |
|-----------------------------------------------|-----------------------------|-----------------------------------------------------------------------------------------------------------------------|-------------|
| Thermal correction to Energy =                | 0.202435 (Hartree/Particle) |                                                                                                                       |             |
| Thermal correction to Enthalpy =              | 0.203379 (Hartree/Particle) |                                                                                                                       |             |
| Thermal correction to Gibbs Free Energy =     | 0.145905 (Hartree/Particle) |                                                                                                                       |             |
| Sum of electronic and zero-point Energies =   | -629.59 (Hartree/Particle)  |                                                                                                                       |             |
| Sum of electronic and thermal Energies =      | -629.576 (Hartree/Particle) |                                                                                                                       |             |
| Sum of electronic and thermal Enthalpies =    | -629.575 (Hartree/Particle) |                                                                                                                       |             |
| Sum of electronic and thermal Free Energies = | -629.632 (Hartree/Particle) |                                                                                                                       |             |
| Center                                        | Coordinates (Angstroms)     |                                                                                                                       |             |
|                                               | X                           | Y                                                                                                                     | Z           |
| C                                             | -1.58355700                 | 1.83380300                                                                                                            | 1.01592700  |
| H                                             | -1.59537000                 | 2.71777900                                                                                                            | 1.63398500  |
| C                                             | -1.06186000                 | 0.55335400                                                                                                            | 1.35065200  |
| H                                             | -0.58468900                 | 0.23652900                                                                                                            | 2.26302600  |
| C                                             | -1.28327700                 | -0.20781900                                                                                                           | 0.24925200  |
| C                                             | -2.06694500                 | 1.72534700                                                                                                            | -0.25092600 |
| H                                             | -2.54686400                 | 2.41804000                                                                                                            | -0.92279500 |
| C                                             | 1.86959100                  | -0.84422900                                                                                                           | -1.28060900 |
| H                                             | 1.40931000                  | -0.99561600                                                                                                           | -2.25197800 |
| C                                             | 2.41352500                  | -0.23475400                                                                                                           | 1.65404100  |
| H                                             | 2.89305000                  | -0.01076900                                                                                                           | 2.60170900  |
| O                                             | -1.88698300                 | 0.47978000                                                                                                            | -0.73183400 |
| N                                             | -0.98231900                 | -1.57838400                                                                                                           | -0.00443100 |
| O                                             | -0.44772900                 | -2.19188400                                                                                                           | 0.90510900  |
| O                                             | -1.27272600                 | -2.04120800                                                                                                           | -1.08979300 |
| H                                             | 1.82922400                  | -1.14887700                                                                                                           | 1.59756700  |
| H                                             | 2.27829400                  | -1.72094500                                                                                                           | -0.78854300 |
| C                                             | 1.93319800                  | 0.36591600                                                                                                            | -0.72178300 |
| C                                             | 2.53244400                  | 0.58512000                                                                                                            | 0.61126500  |
| H                                             | 3.08708000                  | 1.51563900                                                                                                            | 0.73378800  |
| C                                             | 1.42507000                  | 1.60132600                                                                                                            | -1.41648700 |
| H                                             | 2.24640300                  | 2.29974200                                                                                                            | -1.61134100 |
| H                                             | 0.94914500                  | 1.36206900                                                                                                            | -2.36919200 |
| H                                             | 0.70100900                  | 2.13320800                                                                                                            | -0.79106300 |

**A new, comprehensive insight on the competition between (4+2) and (2+4) cycloaddition schemes  
and molecular mechanism of Diels-Alder reaction of 2-nitrofurán with isoprene**

**Table S11.** Thermochemistry and cartesian coordinates of TS of product (5) (path C)  
( $\omega$ B97XD/6-311+G(d), in benzene solution (PCM)).

|                                               |                             |
|-----------------------------------------------|-----------------------------|
| Zero-point correction =                       | 0.189271 (Hartree/Particle) |
| Thermal correction to Energy =                | 0.20123 (Hartree/Particle)  |
| Thermal correction to Enthalpy =              | 0.202174 (Hartree/Particle) |
| Thermal correction to Gibbs Free Energy =     | 0.150951 (Hartree/Particle) |
| Sum of electronic and zero-point Energies =   | -629.545 (Hartree/Particle) |
| Sum of electronic and thermal Energies =      | -629.533 (Hartree/Particle) |
| Sum of electronic and thermal Enthalpies =    | -629.532 (Hartree/Particle) |
| Sum of electronic and thermal Free Energies = | -629.583 (Hartree/Particle) |

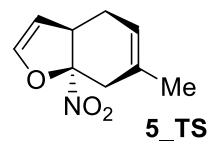

| Center | Coordinates (Angstroms) |              |              |
|--------|-------------------------|--------------|--------------|
|        | X                       | Y            | Z            |
| C      | 0.249090000             | 2.208258000  | -0.095306000 |
| H      | 0.732212000             | 3.126491000  | 0.201118000  |
| C      | -0.371596000            | 1.245248000  | 0.770014000  |
| H      | -0.845253000            | 1.447746000  | 1.716707000  |
| C      | -0.779759000            | 0.208464000  | -0.105654000 |
| C      | 0.158980000             | 1.724319000  | -1.349386000 |
| H      | 0.508676000             | 2.093364000  | -2.300742000 |
| C      | 0.425912000             | -1.498706000 | 0.068590000  |
| H      | 0.043342000             | -2.113323000 | -0.742521000 |
| C      | 1.357732000             | 0.306036000  | 2.014405000  |
| H      | 1.694596000             | 1.095944000  | 2.677874000  |
| O      | -0.553670000            | 0.566532000  | -1.406463000 |
| N      | -2.034635000            | -0.493842000 | 0.112442000  |
| O      | -2.313614000            | -0.740120000 | 1.275485000  |
| O      | -2.699303000            | -0.817831000 | -0.848944000 |
| H      | 0.554773000             | -0.308605000 | 2.402615000  |
| H      | -0.005170000            | -1.719879000 | 1.039080000  |
| C      | 1.715487000             | -0.993359000 | -0.021336000 |
| C      | 2.159991000             | -0.110068000 | 0.982277000  |
| H      | 3.090114000             | 0.425597000  | 0.806336000  |
| C      | 2.540191000             | -1.221365000 | -1.261396000 |
| H      | 3.074719000             | -2.175111000 | -1.202482000 |
| H      | 1.906870000             | -1.261847000 | -2.151188000 |
| H      | 3.284094000             | -0.435094000 | -1.407762000 |

**A new, comprehensive insight on the competition between (4+2) and (2+4) cycloaddition schemes  
and molecular mechanism of Diels-Alder reaction of 2-nitrofurán with isoprene**

**Table S12.** Thermochemistry and cartesian coordinates of **PR** of product (**5**) (path C)  
( $\omega$ B97XD/6-311+G(d), in benzene solution (PCM)).

|                                               |                             |
|-----------------------------------------------|-----------------------------|
| Zero-point correction =                       | 0.194623 (Hartree/Particle) |
| Thermal correction to Energy =                | 0.205773 (Hartree/Particle) |
| Thermal correction to Enthalpy =              | 0.206717 (Hartree/Particle) |
| Thermal correction to Gibbs Free Energy =     | 0.157264 (Hartree/Particle) |
| Sum of electronic and zero-point Energies =   | -629.639 (Hartree/Particle) |
| Sum of electronic and thermal Energies =      | -629.628 (Hartree/Particle) |
| Sum of electronic and thermal Enthalpies =    | -629.627 (Hartree/Particle) |
| Sum of electronic and thermal Free Energies = | -629.677 (Hartree/Particle) |

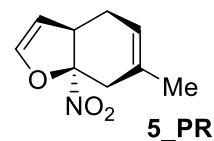

| Center | Coordinates (Angstroms) |             |             |
|--------|-------------------------|-------------|-------------|
|        | X                       | Y           | Z           |
| C      | 0.48386100              | 2.16472200  | 0.24839000  |
| H      | 0.50817500              | 3.22410000  | 0.03998000  |
| C      | 0.30999100              | 1.08811000  | -0.79254700 |
| H      | 1.09846800              | 1.13033300  | -1.54665000 |
| C      | 0.48294800              | -0.17948800 | 0.08763100  |
| C      | 0.58260100              | 1.60149500  | 1.44162000  |
| H      | 0.69910800              | 2.02559500  | 2.42781700  |
| C      | -0.57860000             | -1.25642300 | -0.09807800 |
| H      | -0.43805500             | -2.02232300 | 0.66884700  |
| C      | -1.05543800             | 1.11358300  | -1.51196400 |
| H      | -1.29052400             | 2.14400700  | -1.78797000 |
| O      | 0.50823100              | 0.22892600  | 1.42163700  |
| N      | 1.86549000              | -0.81169300 | -0.22975300 |
| O      | 2.00821900              | -1.20949600 | -1.36952300 |
| O      | 2.69425200              | -0.88063000 | 0.64375700  |
| H      | -0.96024100             | 0.55695300  | -2.45282900 |
| H      | -0.43703100             | -1.73161900 | -1.07342800 |
| C      | -1.94749100             | -0.62009200 | -0.00594800 |
| C      | -2.15373000             | 0.51052800  | -0.67837500 |
| H      | -3.11997100             | 1.00575800  | -0.64356700 |
| C      | -2.97363100             | -1.30382300 | 0.84284700  |
| H      | -3.14288000             | -2.33121700 | 0.50242800  |
| H      | -2.63490100             | -1.36571100 | 1.88261700  |
| H      | -3.92927000             | -0.77608300 | 0.82260400  |

**A new, comprehensive insight on the competition between (4+2) and (2+4) cycloaddition schemes  
and molecular mechanism of Diels-Alder reaction of 2-nitrofurán with isoprene**

**Table S13.** Thermochemistry and cartesian coordinates of MC of product (6) (path D)  
( $\omega$ B97XD/6-311+G(d), in benzene solution (PCM)).

|                                               |                             |                                                                                                                       |
|-----------------------------------------------|-----------------------------|-----------------------------------------------------------------------------------------------------------------------|
| Zero-point correction =                       | 0.188426 (Hartree/Particle) | 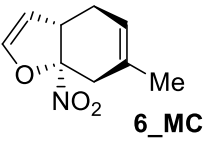 <p align="center"><b>6_MC</b></p> |
| Thermal correction to Energy =                | 0.202312 (Hartree/Particle) |                                                                                                                       |
| Thermal correction to Enthalpy =              | 0.203256 (Hartree/Particle) |                                                                                                                       |
| Thermal correction to Gibbs Free Energy =     | 0.145363 (Hartree/Particle) |                                                                                                                       |
| Sum of electronic and zero-point Energies =   | -629.59 (Hartree/Particle)  |                                                                                                                       |
| Sum of electronic and thermal Energies =      | -629.576 (Hartree/Particle) |                                                                                                                       |
| Sum of electronic and thermal Enthalpies =    | -629.575 (Hartree/Particle) |                                                                                                                       |
| Sum of electronic and thermal Free Energies = | -629.633 (Hartree/Particle) |                                                                                                                       |

  

| Center | Coordinates (Angstroms) |              |              |
|--------|-------------------------|--------------|--------------|
|        | X                       | Y            | Z            |
| C      | -1.936593000            | 0.189141000  | 0.622538000  |
| C      | -2.079185000            | 1.013318000  | -0.595615000 |
| C      | 2.234216000             | 1.660036000  | -0.212371000 |
| H      | -2.268251000            | 0.461778000  | -1.515668000 |
| H      | 2.539997000             | 2.672708000  | -0.423540000 |
| C      | 1.390691000             | 0.830297000  | -1.001553000 |
| H      | 0.895971000             | 1.059462000  | -1.930524000 |
| C      | 1.312646000             | -0.335584000 | -0.311574000 |
| C      | 2.583167000             | 0.919489000  | 0.874350000  |
| H      | 3.203842000             | 1.112495000  | 1.734094000  |
| C      | -1.104012000            | 0.525394000  | 1.610553000  |
| H      | -0.477407000            | 1.410760000  | 1.550865000  |
| H      | -1.006434000            | -0.087119000 | 2.501450000  |
| C      | -2.021404000            | 2.342962000  | -0.642676000 |
| H      | -2.128328000            | 2.878037000  | -1.580780000 |
| H      | -1.883363000            | 2.942168000  | 0.252988000  |
| O      | 2.026271000             | -0.306038000 | 0.822961000  |
| N      | 0.560473000             | -1.516910000 | -0.577029000 |
| O      | -0.099354000            | -1.518002000 | -1.604767000 |
| O      | 0.612671000             | -2.429181000 | 0.224162000  |
| C      | -2.750375000            | -1.076497000 | 0.651530000  |
| H      | -2.484073000            | -1.719891000 | -0.193671000 |
| H      | -2.587561000            | -1.640175000 | 1.571494000  |
| H      | -3.819319000            | -0.857427000 | 0.562555000  |

**A new, comprehensive insight on the competition between (4+2) and (2+4) cycloaddition schemes  
and molecular mechanism of Diels-Alder reaction of 2-nitrofurane with isoprene**

**Table S14.** Thermochemistry and cartesian coordinates of **TS** of product **(6)** (path D)  
( $\omega$ B97XD/6-311+G(d), in benzene solution (PCM)).

|                                               |                             |
|-----------------------------------------------|-----------------------------|
| Zero-point correction =                       | 0.189592 (Hartree/Particle) |
| Thermal correction to Energy =                | 0.201459 (Hartree/Particle) |
| Thermal correction to Enthalpy =              | 0.202403 (Hartree/Particle) |
| Thermal correction to Gibbs Free Energy =     | 0.151465 (Hartree/Particle) |
| Sum of electronic and zero-point Energies =   | -629.546 (Hartree/Particle) |
| Sum of electronic and thermal Energies =      | -629.534 (Hartree/Particle) |
| Sum of electronic and thermal Enthalpies =    | -629.533 (Hartree/Particle) |
| Sum of electronic and thermal Free Energies = | -629.584 (Hartree/Particle) |

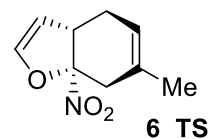

| Center | Coordinates (Angstroms) |             |             |
|--------|-------------------------|-------------|-------------|
|        | X                       | Y           | Z           |
| C      | -1.81226700             | -0.62024000 | -0.57361500 |
| C      | -1.54770100             | -1.68535100 | 0.30807200  |
| C      | 2.35320300              | -1.14335000 | 0.37182900  |
| H      | -2.24743200             | -1.84739600 | 1.12482500  |
| H      | 2.92914900              | -1.98299500 | 0.72989000  |
| C      | 1.06607900              | -0.70391000 | 0.86814000  |
| H      | 0.74065100              | -0.76722800 | 1.89304400  |
| C      | 0.74956100              | 0.39502900  | 0.03495900  |
| C      | 2.68575100              | -0.32680000 | -0.64468300 |
| H      | 3.52782400              | -0.30333400 | -1.31843100 |
| C      | -0.79002900             | -0.17653700 | -1.39068800 |
| H      | -0.03649100             | -0.85846900 | -1.77043700 |
| H      | -0.92085900             | 0.72023800  | -1.98981400 |
| C      | -0.33283500             | -2.33597500 | 0.34766300  |
| H      | -0.14502200             | -3.06936400 | 1.12548600  |
| H      | 0.25910700              | -2.46893100 | -0.54843800 |
| O      | 1.77162800              | 0.66467600  | -0.82953300 |
| N      | 0.04507000              | 1.55318300  | 0.52983400  |
| O      | -0.71897000             | 1.35465600  | 1.46209800  |
| O      | 0.21494000              | 2.62519200  | -0.01881500 |
| C      | -3.08681300             | 0.16920600  | -0.43220300 |
| H      | -3.39526900             | 0.25160600  | 0.61239200  |
| H      | -2.97688400             | 1.17931800  | -0.83205300 |
| H      | -3.90075300             | -0.31434800 | -0.98215400 |

**A new, comprehensive insight on the competition between (4+2) and (2+4) cycloaddition schemes  
and molecular mechanism of Diels-Alder reaction of 2-nitrofurán with isoprene**

**Table S15.** Thermochemistry and cartesian coordinates of **PR** of product (**6**) (path D)  
( $\omega$ B97XD/6-311+G(d), in benzene solution (PCM)).

| Zero-point correction =                       | 0.194454 (Hartree/Particle) | 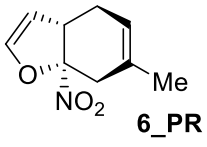 <p align="center"><b>6_PR</b></p> |              |
|-----------------------------------------------|-----------------------------|-----------------------------------------------------------------------------------------------------------------------|--------------|
| Thermal correction to Energy =                | 0.205644 (Hartree/Particle) |                                                                                                                       |              |
| Thermal correction to Enthalpy =              | 0.206589 (Hartree/Particle) |                                                                                                                       |              |
| Thermal correction to Gibbs Free Energy =     | 0.156727 (Hartree/Particle) |                                                                                                                       |              |
| Sum of electronic and zero-point Energies =   | -629.638 (Hartree/Particle) |                                                                                                                       |              |
| Sum of electronic and thermal Energies =      | -629.627 (Hartree/Particle) |                                                                                                                       |              |
| Sum of electronic and thermal Enthalpies =    | -629.626 (Hartree/Particle) |                                                                                                                       |              |
| Sum of electronic and thermal Free Energies = | -629.676 (Hartree/Particle) |                                                                                                                       |              |
| -----                                         |                             |                                                                                                                       |              |
| Center                                        | Coordinates (Angstroms)     |                                                                                                                       |              |
|                                               | X                           | Y                                                                                                                     | Z            |
| -----                                         |                             |                                                                                                                       |              |
| C                                             | -2.049361000                | -0.170121000                                                                                                          | -0.275571000 |
| C                                             | -1.920353000                | -1.286606000                                                                                                          | 0.437939000  |
| C                                             | 1.923914000                 | -1.505789000                                                                                                          | 0.459889000  |
| H                                             | -2.760015000                | -1.682719000                                                                                                          | 1.001997000  |
| H                                             | 2.428193000                 | -2.252909000                                                                                                          | 1.054266000  |
| C                                             | 0.537174000                 | -0.977969000                                                                                                          | 0.721294000  |
| H                                             | 0.424541000                 | -0.564974000                                                                                                          | 1.725665000  |
| C                                             | 0.469770000                 | 0.161936000                                                                                                           | -0.323747000 |
| C                                             | 2.391732000                 | -0.937114000                                                                                                          | -0.640418000 |
| H                                             | 3.320166000                 | -1.063895000                                                                                                          | -1.176829000 |
| C                                             | -0.858519000                | 0.318543000                                                                                                           | -1.067541000 |
| H                                             | -0.757635000                | -0.279480000                                                                                                          | -1.979574000 |
| H                                             | -0.989608000                | 1.353141000                                                                                                           | -1.391943000 |
| C                                             | -0.595565000                | -1.996841000                                                                                                          | 0.500253000  |
| H                                             | -0.575483000                | -2.734467000                                                                                                          | 1.305418000  |
| H                                             | -0.403718000                | -2.546187000                                                                                                          | -0.430932000 |
| O                                             | 1.525722000                 | -0.030581000                                                                                                          | -1.213088000 |
| N                                             | 0.747283000                 | 1.500058000                                                                                                           | 0.427407000  |
| O                                             | -0.131522000                | 1.873207000                                                                                                           | 1.178086000  |
| O                                             | 1.789800000                 | 2.074513000                                                                                                           | 0.230204000  |
| C                                             | -3.311711000                | 0.627176000                                                                                                           | -0.381814000 |
| H                                             | -4.127508000                | 0.166774000                                                                                                           | 0.178954000  |
| H                                             | -3.156172000                | 1.640310000                                                                                                           | 0.003694000  |
| H                                             | -3.628227000                | 0.727597000                                                                                                           | -1.425895000 |
| -----                                         |                             |                                                                                                                       |              |

**A new, comprehensive insight on the competition between (4+2) and (2+4) cycloaddition schemes  
and molecular mechanism of Diels-Alder reaction of 2-nitrofurane with isoprene**

**Table S16.** Thermochemistry and cartesian coordinates of MC of product (7) (path E)  
( $\omega$ B97XD/6-311+G(d), in benzene solution (PCM)).

| Zero-point correction =                       | 0.188959 (Hartree/Particle) | 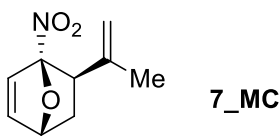 |             |
|-----------------------------------------------|-----------------------------|-------------------------------------------------------------------------------------|-------------|
| Thermal correction to Energy =                | 0.202588 (Hartree/Particle) |                                                                                     |             |
| Thermal correction to Enthalpy =              | 0.203532 (Hartree/Particle) |                                                                                     |             |
| Thermal correction to Gibbs Free Energy =     | 0.146657 (Hartree/Particle) |                                                                                     |             |
| Sum of electronic and zero-point Energies =   | -629.594 (Hartree/Particle) |                                                                                     |             |
| Sum of electronic and thermal Energies =      | -629.58 (Hartree/Particle)  |                                                                                     |             |
| Sum of electronic and thermal Enthalpies =    | -629.579 (Hartree/Particle) |                                                                                     |             |
| Sum of electronic and thermal Free Energies = | -629.636 (Hartree/Particle) |                                                                                     |             |
| -----                                         |                             |                                                                                     |             |
| Center                                        | Coordinates (Angstroms)     |                                                                                     |             |
|                                               | X                           | Y                                                                                   | Z           |
| C                                             | 1.25346400                  | 0.44831200                                                                          | 0.03748000  |
| C                                             | 1.88156800                  | -1.46965000                                                                         | 0.76095300  |
| H                                             | 1.93967600                  | -2.23372300                                                                         | 1.51860100  |
| O                                             | 1.21696100                  | -0.35252500                                                                         | 1.11185400  |
| N                                             | 0.62836700                  | 1.72539300                                                                          | 0.15371200  |
| O                                             | 0.10821400                  | 2.01707700                                                                          | 1.21280200  |
| O                                             | 0.66346400                  | 2.43696100                                                                          | -0.83625200 |
| C                                             | -1.15063100                 | -2.50983000                                                                         | -0.16691700 |
| H                                             | -0.67825900                 | -3.35741800                                                                         | -0.65189600 |
| H                                             | -1.37994500                 | -2.61883900                                                                         | 0.88878700  |
| C                                             | 2.34693100                  | -1.38106700                                                                         | -0.51421700 |
| C                                             | 1.93058900                  | -0.11142900                                                                         | -0.99792100 |
| H                                             | 2.10103000                  | 0.33241900                                                                          | -1.96519700 |
| H                                             | 2.91050000                  | -2.13217300                                                                         | -1.04498000 |
| C                                             | -2.06461200                 | -0.19169700                                                                         | -0.29142800 |
| C                                             | -2.27655300                 | 0.86463100                                                                          | -1.08307000 |
| H                                             | -1.99428400                 | 0.85316800                                                                          | -2.13190100 |
| H                                             | -2.72613400                 | 1.77849500                                                                          | -0.70847600 |
| C                                             | -1.43181700                 | -1.39739800                                                                         | -0.84623300 |
| H                                             | -1.17454100                 | -1.35037700                                                                         | -1.90316000 |
| C                                             | -2.43954200                 | -0.18512300                                                                         | 1.16446600  |
| H                                             | -1.56135100                 | -0.35008200                                                                         | 1.79531100  |
| H                                             | -2.88310800                 | 0.76868700                                                                          | 1.45233500  |
| H                                             | -3.15764900                 | -0.98050400                                                                         | 1.38868500  |

**A new, comprehensive insight on the competition between (4+2) and (2+4) cycloaddition schemes  
and molecular mechanism of Diels-Alder reaction of 2-nitrofulran with isoprene**

**Table S17.** Thermochemistry and cartesian coordinates of **TS** of product (**7**) (path E)  
( $\omega$ B97XD/6-311+G(d), in benzene solution (PCM)).

|                                               |                                |                                                                                     |              |
|-----------------------------------------------|--------------------------------|-------------------------------------------------------------------------------------|--------------|
| Zero-point correction =                       | 0.189996 (Hartree/Particle)    | 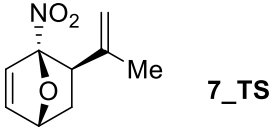 |              |
| Thermal correction to Energy =                | 0.201615 (Hartree/Particle)    |                                                                                     |              |
| Thermal correction to Enthalpy =              | 0.202559 (Hartree/Particle)    |                                                                                     |              |
| Thermal correction to Gibbs Free Energy =     | 0.15258 (Hartree/Particle)     |                                                                                     |              |
| Sum of electronic and zero-point Energies =   | -629.553 (Hartree/Particle)    |                                                                                     |              |
| Sum of electronic and thermal Energies =      | -629.541 (Hartree/Particle)    |                                                                                     |              |
| Sum of electronic and thermal Enthalpies =    | -629.54 (Hartree/Particle)     |                                                                                     |              |
| Sum of electronic and thermal Free Energies = | -629.59 (Hartree/Particle)     |                                                                                     |              |
| <b>Center</b>                                 |                                |                                                                                     |              |
|                                               | <b>Coordinates (Angstroms)</b> |                                                                                     |              |
|                                               | <b>X</b>                       | <b>Y</b>                                                                            | <b>Z</b>     |
| C                                             | 0.746911000                    | 0.764994000                                                                         | 0.135256000  |
| C                                             | 1.929385000                    | -0.919631000                                                                        | 0.633997000  |
| H                                             | 2.346896000                    | -1.612636000                                                                        | 1.350887000  |
| O                                             | 0.996315000                    | -0.067809000                                                                        | 1.160849000  |
| N                                             | -0.314826000                   | 1.693655000                                                                         | 0.288484000  |
| O                                             | -1.003020000                   | 1.628510000                                                                         | 1.290884000  |
| O                                             | -0.511951000                   | 2.454434000                                                                         | -0.651079000 |
| C                                             | 0.673152000                    | -2.016579000                                                                        | -0.433680000 |
| H                                             | 1.374077000                    | -2.466590000                                                                        | -1.127109000 |
| H                                             | 0.359536000                    | -2.685877000                                                                        | 0.362154000  |
| C                                             | 2.649900000                    | -0.207472000                                                                        | -0.372641000 |
| C                                             | 1.858032000                    | 0.854469000                                                                         | -0.719084000 |
| H                                             | 1.975073000                    | 1.564089000                                                                         | -1.522725000 |
| H                                             | 3.549781000                    | -0.552064000                                                                        | -0.859737000 |
| C                                             | -1.623751000                   | -0.947262000                                                                        | -0.405459000 |
| C                                             | -2.519501000                   | -0.215229000                                                                        | -1.084926000 |
| H                                             | -2.269225000                   | 0.253530000                                                                         | -2.031648000 |
| H                                             | -3.528016000                   | -0.065997000                                                                        | -0.714472000 |
| C                                             | -0.278182000                   | -1.124817000                                                                        | -0.948518000 |
| H                                             | -0.117975000                   | -0.722463000                                                                        | -1.944045000 |
| C                                             | -1.965540000                   | -1.590594000                                                                        | 0.911473000  |
| H                                             | -1.253266000                   | -1.299333000                                                                        | 1.687041000  |
| H                                             | -2.961531000                   | -1.293822000                                                                        | 1.242027000  |
| H                                             | -1.944762000                   | -2.682777000                                                                        | 0.834492000  |

**A new, comprehensive insight on the competition between (4+2) and (2+4) cycloaddition schemes  
and molecular mechanism of Diels-Alder reaction of 2-nitrofurane with isoprene**

**Table S18.** Thermochemistry and cartesian coordinates of **PR** of product (**7**) (path E)  
( $\omega$ B97XD/6-311+G(d), in benzene solution (PCM)).

| Zero-point correction =                       | 0.193892 (Hartree/Particle) | 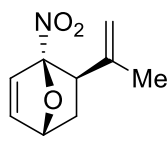 | <b>7_PR</b> |
|-----------------------------------------------|-----------------------------|-------------------------------------------------------------------------------------|-------------|
| Thermal correction to Energy =                | 0.205071 (Hartree/Particle) |                                                                                     |             |
| Thermal correction to Enthalpy =              | 0.206015 (Hartree/Particle) |                                                                                     |             |
| Thermal correction to Gibbs Free Energy =     | 0.156638 (Hartree/Particle) |                                                                                     |             |
| Sum of electronic and zero-point Energies =   | -629.603 (Hartree/Particle) |                                                                                     |             |
| Sum of electronic and thermal Energies =      | -629.592 (Hartree/Particle) |                                                                                     |             |
| Sum of electronic and thermal Enthalpies =    | -629.591 (Hartree/Particle) |                                                                                     |             |
| Sum of electronic and thermal Free Energies = | -629.64 (Hartree/Particle)  |                                                                                     |             |
| Center                                        | Coordinates (Angstroms)     |                                                                                     |             |
|                                               | X                           | Y                                                                                   | Z           |
| C                                             | 0.54352100                  | 0.48677800                                                                          | -0.00089000 |
| C                                             | 1.85922200                  | -1.05466100                                                                         | 0.51867600  |
| H                                             | 2.41079100                  | -1.63460500                                                                         | 1.25291500  |
| O                                             | 1.00481000                  | -0.10432000                                                                         | 1.17849100  |
| N                                             | -0.36618100                 | 1.63747100                                                                          | 0.26319700  |
| O                                             | -0.82745600                 | 1.77400000                                                                          | 1.37054300  |
| O                                             | -0.60805900                 | 2.33815900                                                                          | -0.70018700 |
| C                                             | 0.82462600                  | -1.83499400                                                                         | -0.34182900 |
| H                                             | 1.28054800                  | -2.32784600                                                                         | -1.20042300 |
| H                                             | 0.33501600                  | -2.59166600                                                                         | 0.26951700  |
| C                                             | 2.64561600                  | -0.15882500                                                                         | -0.42277000 |
| C                                             | 1.81424300                  | 0.82174600                                                                          | -0.75646100 |
| H                                             | 1.91344700                  | 1.61589700                                                                          | -1.48166900 |
| H                                             | 3.63332000                  | -0.36572000                                                                         | -0.81169900 |
| C                                             | -1.60902500                 | -0.90425000                                                                         | -0.35326100 |
| C                                             | -2.57030100                 | -0.57385200                                                                         | -1.21447300 |
| H                                             | -2.34494300                 | -0.19422800                                                                         | -2.20660100 |
| H                                             | -3.62028500                 | -0.66592100                                                                         | -0.95419900 |
| C                                             | -0.16372400                 | -0.70920400                                                                         | -0.75598700 |
| H                                             | -0.12082900                 | -0.51030600                                                                         | -1.82667200 |
| C                                             | -1.92196000                 | -1.42877300                                                                         | 1.02346100  |
| H                                             | -1.34416600                 | -0.91044800                                                                         | 1.79114100  |
| H                                             | -2.98272400                 | -1.30969900                                                                         | 1.24922600  |
| H                                             | -1.68457500                 | -2.49426100                                                                         | 1.10650900  |

**A new, comprehensive insight on the competition between (4+2) and (2+4) cycloaddition schemes  
and molecular mechanism of Diels-Alder reaction of 2-nitrofurane with isoprene**

**Table S19.** Thermochemistry and cartesian coordinates of MC of product (**8**) (path F)  
( $\omega$ B97XD/6-311+G(d), in benzene solution (PCM)).

| Zero-point correction =                       | 0.188833 (Hartree/Particle) | 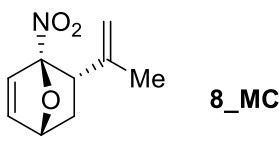 |              |
|-----------------------------------------------|-----------------------------|-------------------------------------------------------------------------------------|--------------|
| Thermal correction to Energy =                | 0.202543 (Hartree/Particle) |                                                                                     |              |
| Thermal correction to Enthalpy =              | 0.203487 (Hartree/Particle) |                                                                                     |              |
| Thermal correction to Gibbs Free Energy =     | 0.145914 (Hartree/Particle) |                                                                                     |              |
| Sum of electronic and zero-point Energies =   | -629.594 (Hartree/Particle) |                                                                                     |              |
| Sum of electronic and thermal Energies =      | -629.58 (Hartree/Particle)  |                                                                                     |              |
| Sum of electronic and thermal Enthalpies =    | -629.579 (Hartree/Particle) |                                                                                     |              |
| Sum of electronic and thermal Free Energies = | -629.637 (Hartree/Particle) |                                                                                     |              |
| -----                                         |                             |                                                                                     |              |
| Center                                        | Coordinates (Angstroms)     |                                                                                     |              |
|                                               | X                           | Y                                                                                   | Z            |
| C                                             | -1.306997000                | -0.085377000                                                                        | -0.229567000 |
| C                                             | -1.614230000                | 1.985790000                                                                         | 0.225421000  |
| C                                             | 1.602608000                 | 0.383486000                                                                         | 1.178972000  |
| H                                             | -1.876274000                | 2.790033000                                                                         | 0.893124000  |
| O                                             | -1.664692000                | 0.750212000                                                                         | 0.755296000  |
| N                                             | -1.245420000                | -1.475731000                                                                        | 0.080361000  |
| O                                             | -1.396304000                | -1.815091000                                                                        | 1.239392000  |
| O                                             | -1.028992000                | -2.229686000                                                                        | -0.852682000 |
| C                                             | 1.569413000                 | 1.711340000                                                                         | 1.298549000  |
| H                                             | 1.921296000                 | 2.375802000                                                                         | 0.515411000  |
| H                                             | 1.185691000                 | 2.181036000                                                                         | 2.198080000  |
| C                                             | 2.095615000                 | -0.357548000                                                                        | 0.009049000  |
| C                                             | 2.067939000                 | -1.694036000                                                                        | 0.012900000  |
| H                                             | 1.690086000                 | -2.251258000                                                                        | 0.865353000  |
| H                                             | 2.410151000                 | -2.276036000                                                                        | -0.836716000 |
| C                                             | -1.238278000                | 1.942241000                                                                         | -1.081988000 |
| C                                             | -1.036056000                | 0.569215000                                                                         | -1.387656000 |
| H                                             | -0.724743000                | 0.121099000                                                                         | -2.317120000 |
| H                                             | -1.118521000                | 2.786126000                                                                         | -1.743197000 |
| C                                             | 2.608751000                 | 0.424607000                                                                         | -1.168115000 |
| H                                             | 3.470853000                 | 1.038433000                                                                         | -0.888216000 |
| H                                             | 2.913393000                 | -0.237298000                                                                        | -1.980365000 |
| H                                             | 1.842342000                 | 1.106125000                                                                         | -1.551415000 |
| H                                             | 1.230980000                 | -0.225736000                                                                        | 2.001092000  |
| -----                                         |                             |                                                                                     |              |

**A new, comprehensive insight on the competition between (4+2) and (2+4) cycloaddition schemes  
and molecular mechanism of Diels-Alder reaction of 2-nitrofurane with isoprene**

**Table S20.** Thermochemistry and cartesian coordinates of TS of product (**8**) (path F)  
( $\omega$ B97XD/6-311+G(d), in benzene solution (PCM)).

| Zero-point correction =                       | 0.190007 (Hartree/Particle) | 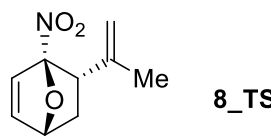 |             |
|-----------------------------------------------|-----------------------------|-------------------------------------------------------------------------------------|-------------|
| Thermal correction to Energy =                | 0.201636 (Hartree/Particle) |                                                                                     |             |
| Thermal correction to Enthalpy =              | 0.20258 (Hartree/Particle)  |                                                                                     |             |
| Thermal correction to Gibbs Free Energy =     | 0.152413 (Hartree/Particle) |                                                                                     |             |
| Sum of electronic and zero-point Energies =   | -629.553 (Hartree/Particle) |                                                                                     |             |
| Sum of electronic and thermal Energies =      | -629.541 (Hartree/Particle) |                                                                                     |             |
| Sum of electronic and thermal Enthalpies =    | -629.54 (Hartree/Particle)  |                                                                                     |             |
| Sum of electronic and thermal Free Energies = | -629.59 (Hartree/Particle)  |                                                                                     |             |
| Coordinates (Angstroms)                       |                             |                                                                                     |             |
| Center                                        | X                           | Y                                                                                   | Z           |
| C                                             | 1.00303600                  | 0.26463300                                                                          | 0.29788200  |
| C                                             | 0.34837800                  | 2.21250800                                                                          | -0.20064800 |
| C                                             | -0.88487700                 | -0.04986800                                                                         | -1.06691300 |
| H                                             | 0.47897000                  | 3.17007700                                                                          | -0.68441400 |
| O                                             | 1.31106200                  | 1.28960300                                                                          | -0.51604800 |
| N                                             | 1.69212700                  | -0.96253700                                                                         | 0.11525800  |
| O                                             | 2.41201100                  | -1.09257300                                                                         | -0.86289500 |
| O                                             | 1.45088200                  | -1.84021600                                                                         | 0.93371600  |
| C                                             | -1.10969000                 | 1.32361900                                                                          | -1.22809400 |
| H                                             | -2.00642000                 | 1.76544500                                                                          | -0.80574200 |
| H                                             | -0.81025200                 | 1.76062200                                                                          | -2.17523900 |
| C                                             | -1.71252100                 | -0.95235000                                                                         | -0.26786200 |
| C                                             | -1.48255300                 | -2.27276000                                                                         | -0.31177200 |
| H                                             | -0.69573700                 | -2.69244200                                                                         | -0.93082100 |
| H                                             | -2.07647600                 | -2.97386800                                                                         | 0.26524900  |
| C                                             | -0.04149200                 | 1.99559300                                                                          | 1.15321100  |
| C                                             | 0.35318900                  | 0.71968700                                                                          | 1.45683900  |
| H                                             | 0.14049700                  | 0.12404200                                                                          | 2.33003200  |
| H                                             | -0.66095500                 | 2.65801800                                                                          | 1.73917800  |
| C                                             | -2.81690900                 | -0.36835700                                                                         | 0.57233600  |
| H                                             | -3.58933200                 | 0.08359300                                                                          | -0.05848700 |
| H                                             | -3.29065500                 | -1.13528500                                                                         | 1.18683800  |
| H                                             | -2.44643500                 | 0.41660900                                                                          | 1.23736900  |
| H                                             | -0.21909900                 | -0.52978700                                                                         | -1.77882200 |

**A new, comprehensive insight on the competition between (4+2) and (2+4) cycloaddition schemes  
and molecular mechanism of Diels-Alder reaction of 2-nitrofurane with isoprene**

**Table S21.** Thermochemistry and cartesian coordinates of **PR** of product (**8**) (path F)  
( $\omega$ B97XD/6-311+G(d), in benzene solution (PCM)).

| Zero-point correction =                       | 0.193920 (Hartree/Particle) | 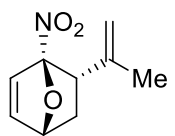 | <b>8_PR</b>  |
|-----------------------------------------------|-----------------------------|-------------------------------------------------------------------------------------|--------------|
| Thermal correction to Energy =                | 0.205108 (Hartree/Particle) |                                                                                     |              |
| Thermal correction to Enthalpy =              | 0.206052 (Hartree/Particle) |                                                                                     |              |
| Thermal correction to Gibbs Free Energy =     | 0.156121 (Hartree/Particle) |                                                                                     |              |
| Sum of electronic and zero-point Energies =   | -629.601 (Hartree/Particle) |                                                                                     |              |
| Sum of electronic and thermal Energies =      | -629.59 (Hartree/Particle)  |                                                                                     |              |
| Sum of electronic and thermal Enthalpies =    | -629.589 (Hartree/Particle) |                                                                                     |              |
| Sum of electronic and thermal Free Energies = | -629.639 (Hartree/Particle) |                                                                                     |              |
| Center                                        | Coordinates (Angstroms)     |                                                                                     |              |
|                                               | X                           | Y                                                                                   | Z            |
| C                                             | 0.722275000                 | 0.031977000                                                                         | 0.095956000  |
| C                                             | 0.737858000                 | 2.064232000                                                                         | -0.405020000 |
| C                                             | -0.566000000                | 0.080958000                                                                         | -0.812937000 |
| H                                             | 1.220816000                 | 2.945869000                                                                         | -0.816146000 |
| O                                             | 1.572072000                 | 0.907965000                                                                         | -0.591121000 |
| N                                             | 1.303187000                 | -1.342636000                                                                        | 0.163059000  |
| O                                             | 1.950293000                 | -1.726330000                                                                        | -0.784727000 |
| O                                             | 1.028050000                 | -2.000595000                                                                        | 1.145360000  |
| C                                             | -0.577138000                | 1.605515000                                                                         | -1.103748000 |
| H                                             | -1.448686000                | 2.121585000                                                                         | -0.701620000 |
| H                                             | -0.527260000                | 1.794573000                                                                         | -2.176032000 |
| C                                             | -1.801935000                | -0.576451000                                                                        | -0.244208000 |
| C                                             | -2.041981000                | -1.854605000                                                                        | -0.534821000 |
| H                                             | -1.390150000                | -2.424491000                                                                        | -1.191142000 |
| H                                             | -2.897657000                | -2.380991000                                                                        | -0.123668000 |
| C                                             | 0.487476000                 | 2.020160000                                                                         | 1.091197000  |
| C                                             | 0.474954000                 | 0.730554000                                                                         | 1.412893000  |
| H                                             | 0.234203000                 | 0.241838000                                                                         | 2.344641000  |
| H                                             | 0.256013000                 | 2.871575000                                                                         | 1.716855000  |
| C                                             | -2.729429000                | 0.219176000                                                                         | 0.633687000  |
| H                                             | -3.270787000                | 0.971372000                                                                         | 0.050430000  |
| H                                             | -3.470225000                | -0.428754000                                                                        | 1.104723000  |
| H                                             | -2.192592000                | 0.753921000                                                                         | 1.420930000  |
| H                                             | -0.275778000                | -0.445465000                                                                        | -1.724476000 |

**A new, comprehensive insight on the competition between (4+2) and (2+4) cycloaddition schemes  
and molecular mechanism of Diels-Alder reaction of 2-nitrofurane with isoprene**

**Table S22.** Thermochemistry and cartesian coordinates of MC of product (**9**) (path G)  
( $\omega$ B97XD/6-311+G(d), in benzene solution (PCM)).

| Zero-point correction =                       | 0.188595 (Hartree/Particle) | 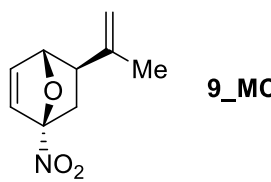 |             |
|-----------------------------------------------|-----------------------------|-------------------------------------------------------------------------------------|-------------|
| Thermal correction to Energy =                | 0.20237 (Hartree/Particle)  |                                                                                     |             |
| Thermal correction to Enthalpy =              | 0.203314 (Hartree/Particle) |                                                                                     |             |
| Thermal correction to Gibbs Free Energy =     | 0.145894 (Hartree/Particle) |                                                                                     |             |
| Sum of electronic and zero-point Energies =   | -629.59 (Hartree/Particle)  |                                                                                     |             |
| Sum of electronic and thermal Energies =      | -629.576 (Hartree/Particle) |                                                                                     |             |
| Sum of electronic and thermal Enthalpies =    | -629.575 (Hartree/Particle) |                                                                                     |             |
| Sum of electronic and thermal Free Energies = | -629.632 (Hartree/Particle) |                                                                                     |             |
| <b>9_MC</b>                                   |                             |                                                                                     |             |
| Center                                        | Coordinates (Angstroms)     |                                                                                     |             |
|                                               | X                           | Y                                                                                   | Z           |
| C                                             | 1.27369400                  | 0.40987500                                                                          | 0.14516700  |
| C                                             | 0.69363200                  | 2.26829400                                                                          | -0.75034000 |
| H                                             | 0.55609600                  | 2.91919600                                                                          | -1.59808200 |
| O                                             | 1.18859200                  | 1.04784100                                                                          | -1.02926600 |
| N                                             | 1.74995900                  | -0.93454900                                                                         | 0.12655600  |
| O                                             | 2.03020200                  | -1.43266500                                                                         | -0.94569700 |
| O                                             | 1.83218800                  | -1.49270100                                                                         | 1.20866700  |
| C                                             | -1.47374800                 | -1.40529700                                                                         | 0.39285200  |
| C                                             | 0.47586700                  | 2.41402300                                                                          | 0.58470600  |
| C                                             | 0.85892800                  | 1.18263700                                                                          | 1.18198300  |
| H                                             | 0.83241000                  | 0.89830100                                                                          | 2.22135500  |
| H                                             | 0.08549000                  | 3.28940600                                                                          | 1.07951300  |
| C                                             | -1.26826600                 | -2.52308100                                                                         | -0.30077000 |
| H                                             | -0.79029200                 | -3.38420800                                                                         | 0.15345900  |
| H                                             | -1.56792200                 | -2.61728800                                                                         | -1.34048300 |
| C                                             | -2.07980800                 | -0.16121300                                                                         | -0.12669100 |
| C                                             | -1.94420900                 | 0.22374800                                                                          | -1.39747500 |
| H                                             | -2.40883300                 | 1.13439800                                                                          | -1.76354000 |
| H                                             | -1.35453000                 | -0.34602600                                                                         | -2.10845400 |
| C                                             | -2.82955200                 | 0.66370200                                                                          | 0.88410300  |
| H                                             | -3.23269400                 | 1.57734700                                                                          | 0.44327600  |
| H                                             | -3.65759400                 | 0.09530400                                                                          | 1.31974900  |
| H                                             | -2.17009200                 | 0.94768500                                                                          | 1.71193100  |
| H                                             | -1.18884200                 | -1.38820000                                                                         | 1.44455800  |

**A new, comprehensive insight on the competition between (4+2) and (2+4) cycloaddition schemes  
and molecular mechanism of Diels-Alder reaction of 2-nitrofurane with isoprene**

**Table S23.** Thermochemistry and cartesian coordinates of **TS** of product **(9)** (path G)  
( $\omega$ B97XD/6-311+G(d), in benzene solution (PCM)).

| Zero-point correction =                       | 0.189617 (Hartree/Particle) | 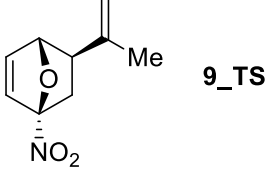 |              |
|-----------------------------------------------|-----------------------------|-------------------------------------------------------------------------------------|--------------|
| Thermal correction to Energy =                | 0.201426 (Hartree/Particle) |                                                                                     |              |
| Thermal correction to Enthalpy =              | 0.20237 (Hartree/Particle)  |                                                                                     |              |
| Thermal correction to Gibbs Free Energy =     | 0.15133 (Hartree/Particle)  |                                                                                     |              |
| Sum of electronic and zero-point Energies =   | -629.547 (Hartree/Particle) |                                                                                     |              |
| Sum of electronic and thermal Energies =      | -629.535 (Hartree/Particle) |                                                                                     |              |
| Sum of electronic and thermal Enthalpies =    | -629.534 (Hartree/Particle) |                                                                                     |              |
| Sum of electronic and thermal Free Energies = | -629.585 (Hartree/Particle) |                                                                                     |              |
| <b>9_TS</b>                                   |                             |                                                                                     |              |
| Center                                        | Coordinates (Angstroms)     |                                                                                     |              |
|                                               | X                           | Y                                                                                   | Z            |
| C                                             | 1.199263000                 | 0.290512000                                                                         | -0.093144000 |
| C                                             | -0.498051000                | 1.171739000                                                                         | -0.984095000 |
| H                                             | -1.328829000                | 1.197723000                                                                         | -1.672533000 |
| O                                             | 0.328064000                 | 0.107676000                                                                         | -1.111156000 |
| N                                             | 2.289452000                 | -0.667142000                                                                        | -0.028753000 |
| O                                             | 2.254572000                 | -1.633892000                                                                        | -0.759128000 |
| O                                             | 3.144495000                 | -0.440495000                                                                        | 0.808427000  |
| C                                             | -1.336913000                | 0.214827000                                                                         | 0.886828000  |
| C                                             | 0.204050000                 | 2.230398000                                                                         | -0.371446000 |
| C                                             | 1.334778000                 | 1.677092000                                                                         | 0.171503000  |
| H                                             | 2.079258000                 | 2.123737000                                                                         | 0.810979000  |
| H                                             | -0.153520000                | 3.244432000                                                                         | -0.272152000 |
| C                                             | -0.128190000                | -0.300292000                                                                        | 1.361147000  |
| H                                             | 0.346254000                 | 0.164259000                                                                         | 2.216755000  |
| H                                             | 0.054922000                 | -1.367889000                                                                        | 1.279029000  |
| C                                             | -2.371507000                | -0.590875000                                                                        | 0.199874000  |
| C                                             | -2.132124000                | -1.770312000                                                                        | -0.379868000 |
| H                                             | -2.923052000                | -2.317137000                                                                        | -0.882801000 |
| H                                             | -1.148338000                | -2.227736000                                                                        | -0.387715000 |
| C                                             | -3.736926000                | 0.043709000                                                                         | 0.168133000  |
| H                                             | -4.457889000                | -0.569492000                                                                        | -0.374930000 |
| H                                             | -4.117499000                | 0.201868000                                                                         | 1.182576000  |
| H                                             | -3.697466000                | 1.029269000                                                                         | -0.310350000 |
| H                                             | -1.703337000                | 1.123859000                                                                         | 1.353673000  |

**A new, comprehensive insight on the competition between (4+2) and (2+4) cycloaddition schemes  
and molecular mechanism of Diels-Alder reaction of 2-nitrofurane with isoprene**

**Table S24.** Thermochemistry and cartesian coordinates of **PR** of product (**9**) (path G)  
( $\omega$ B97XD/6-311+G(d), in benzene solution (PCM)).

|                                               |                             |                                                                                     |
|-----------------------------------------------|-----------------------------|-------------------------------------------------------------------------------------|
| Zero-point correction =                       | 0.193776 (Hartree/Particle) | 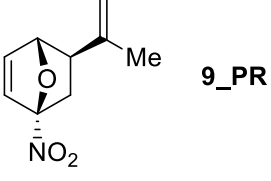 |
| Thermal correction to Energy =                | 0.204976 (Hartree/Particle) |                                                                                     |
| Thermal correction to Enthalpy =              | 0.20592 (Hartree/Particle)  |                                                                                     |
| Thermal correction to Gibbs Free Energy =     | 0.155799 (Hartree/Particle) |                                                                                     |
| Sum of electronic and zero-point Energies =   | -629.601 (Hartree/Particle) |                                                                                     |
| Sum of electronic and thermal Energies =      | -629.59 (Hartree/Particle)  |                                                                                     |
| Sum of electronic and thermal Enthalpies =    | -629.589 (Hartree/Particle) |                                                                                     |
| Sum of electronic and thermal Free Energies = | -629.639 (Hartree/Particle) |                                                                                     |

  

| Center | Coordinates (Angstroms) |             |             |
|--------|-------------------------|-------------|-------------|
|        | X                       | Y           | Z           |
| C      | 1.07016000              | 0.18943000  | 0.03417800  |
| C      | -0.65558200             | 1.02487600  | -0.79529000 |
| H      | -1.35743900             | 1.16228400  | -1.61312700 |
| O      | 0.34311800              | 0.06048000  | -1.15323800 |
| N      | 2.30059600              | -0.65638800 | 0.02484100  |
| O      | 2.43242600              | -1.48710800 | -0.84064000 |
| O      | 3.07491000              | -0.45248500 | 0.94066400  |
| C      | -1.24783200             | 0.37382000  | 0.51196700  |
| C      | 0.19436500              | 2.20875300  | -0.36841800 |
| C      | 1.29702100              | 1.68556000  | 0.15568700  |
| H      | 2.12121000              | 2.15065700  | 0.67642700  |
| H      | -0.11198400             | 3.24557400  | -0.39592600 |
| C      | 0.03976900              | -0.24369300 | 1.11405200  |
| H      | 0.29262700              | 0.14495200  | 2.09879400  |
| H      | -0.01296300             | -1.33064600 | 1.16792200  |
| C      | -2.37607400             | -0.57899400 | 0.17510400  |
| C      | -2.18724500             | -1.82807100 | -0.24247600 |
| H      | -3.02714400             | -2.45690500 | -0.52133700 |
| H      | -1.20156900             | -2.26917300 | -0.34367300 |
| C      | -3.74623700             | 0.03464800  | 0.26930400  |
| H      | -4.52574700             | -0.65458800 | -0.05956800 |
| H      | -3.96706500             | 0.33792000  | 1.29852500  |
| H      | -3.81216300             | 0.94002600  | -0.34543500 |
| H      | -1.63563700             | 1.15953100  | 1.16457400  |

**A new, comprehensive insight on the competition between (4+2) and (2+4) cycloaddition schemes  
and molecular mechanism of Diels-Alder reaction of 2-nitrofurane with isoprene**

**Table S25.** Thermochemistry and cartesian coordinates of **MC** of product (**10**) (path H)  
( $\omega$ B97XD/6-311+G(d), in benzene solution (PCM)).

|                                               |                             |                                                                                     |
|-----------------------------------------------|-----------------------------|-------------------------------------------------------------------------------------|
| Zero-point correction =                       | 0.188267 (Hartree/Particle) | 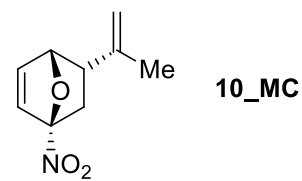 |
| Thermal correction to Energy =                | 0.202302 (Hartree/Particle) |                                                                                     |
| Thermal correction to Enthalpy =              | 0.203246 (Hartree/Particle) |                                                                                     |
| Thermal correction to Gibbs Free Energy =     | 0.143656 (Hartree/Particle) |                                                                                     |
| Sum of electronic and zero-point Energies =   | -629.589 (Hartree/Particle) |                                                                                     |
| Sum of electronic and thermal Energies =      | -629.574 (Hartree/Particle) |                                                                                     |
| Sum of electronic and thermal Enthalpies =    | -629.574 (Hartree/Particle) |                                                                                     |
| Sum of electronic and thermal Free Energies = | -629.633 (Hartree/Particle) |                                                                                     |

| Center | Coordinates (Angstroms) |              |              |
|--------|-------------------------|--------------|--------------|
|        | X                       | Y            | Z            |
| C      | 1.353975000             | 0.508146000  | 0.238132000  |
| C      | 0.294850000             | 2.182505000  | -0.578130000 |
| C      | -0.516458000            | -1.747160000 | -1.110143000 |
| H      | 0.005296000             | -2.003945000 | -2.025575000 |
| H      | -0.077139000            | -2.103452000 | -0.182586000 |
| C      | -1.640814000            | -1.032924000 | -1.134393000 |
| H      | 0.083390000             | 2.890465000  | -1.362831000 |
| O      | 1.253960000             | 1.278572000  | -0.854630000 |
| N      | 2.293029000             | -0.563438000 | 0.196258000  |
| O      | 2.960573000             | -0.708165000 | -0.809574000 |
| O      | 2.350355000             | -1.272380000 | 1.189100000  |
| C      | -2.444327000            | -0.619699000 | 0.035507000  |
| C      | -2.396186000            | -1.253449000 | 1.209655000  |
| H      | -2.987503000            | -0.917423000 | 2.055911000  |
| H      | -1.783561000            | -2.135912000 | 1.364468000  |
| C      | 0.493869000             | 0.886684000  | 1.217869000  |
| C      | -0.203690000            | 1.998783000  | 0.674070000  |
| H      | 0.374623000             | 0.422921000  | 2.182953000  |
| H      | -0.980010000            | 2.578344000  | 1.148098000  |
| H      | -2.010890000            | -0.688372000 | -2.099427000 |
| C      | -3.348276000            | 0.561919000  | -0.194479000 |
| H      | -2.779838000            | 1.424480000  | -0.556606000 |
| H      | -4.095652000            | 0.330619000  | -0.961145000 |
| H      | -3.876680000            | 0.853285000  | 0.715240000  |

**A new, comprehensive insight on the competition between (4+2) and (2+4) cycloaddition schemes  
and molecular mechanism of Diels-Alder reaction of 2-nitrofurane with isoprene**

**Table S26.** Thermochemistry and cartesian coordinates of **TS** of product (**10**) (path H)  
( $\omega$ B97XD/6-311+G(d), in benzene solution (PCM)).

| Zero-point correction =                       | 0.189526 (Hartree/Particle) | 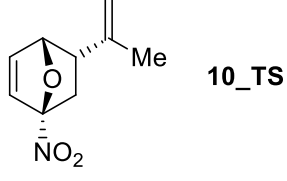 |             |
|-----------------------------------------------|-----------------------------|-------------------------------------------------------------------------------------|-------------|
| Thermal correction to Energy =                | 0.201389 (Hartree/Particle) |                                                                                     |             |
| Thermal correction to Enthalpy =              | 0.202333 (Hartree/Particle) |                                                                                     |             |
| Thermal correction to Gibbs Free Energy =     | 0.151017 (Hartree/Particle) |                                                                                     |             |
| Sum of electronic and zero-point Energies =   | -629.549 (Hartree/Particle) |                                                                                     |             |
| Sum of electronic and thermal Energies =      | -629.537 (Hartree/Particle) |                                                                                     |             |
| Sum of electronic and thermal Enthalpies =    | -629.536 (Hartree/Particle) |                                                                                     |             |
| Sum of electronic and thermal Free Energies = | -629.587 (Hartree/Particle) |                                                                                     |             |
| Center                                        | Coordinates (Angstroms)     |                                                                                     |             |
|                                               | X                           | Y                                                                                   | Z           |
| C                                             | 1.15541300                  | 0.16999600                                                                          | 0.20341100  |
| C                                             | -0.36202300                 | 1.64033600                                                                          | 0.27475200  |
| C                                             | -0.02997100                 | -0.82983500                                                                         | -1.05798000 |
| H                                             | 0.60700400                  | -0.69818200                                                                         | -1.92778100 |
| H                                             | 0.02236200                  | -1.82228600                                                                         | -0.62426900 |
| C                                             | -1.22625900                 | -0.10821700                                                                         | -1.02228600 |
| H                                             | -0.85280500                 | 2.54587700                                                                          | -0.04650100 |
| O                                             | 0.84340700                  | 1.39358300                                                                          | -0.29583200 |
| N                                             | 2.49948200                  | -0.29776700                                                                         | -0.11095800 |
| O                                             | 3.16357400                  | 0.33841400                                                                          | -0.89970300 |
| O                                             | 2.83480100                  | -1.33987900                                                                         | 0.42146000  |
| C                                             | -2.42756100                 | -0.53110700                                                                         | -0.28717500 |
| C                                             | -2.47151700                 | -1.60969200                                                                         | 0.50352300  |
| H                                             | -3.37173400                 | -1.86446300                                                                         | 1.05348300  |
| H                                             | -1.62805400                 | -2.28056300                                                                         | 0.62777200  |
| C                                             | 0.55239400                  | 0.01177700                                                                          | 1.47789400  |
| C                                             | -0.45972000                 | 0.93953700                                                                          | 1.48582800  |
| H                                             | 0.76777000                  | -0.77451700                                                                         | 2.18325400  |
| H                                             | -1.25151600                 | 1.04494800                                                                          | 2.21133100  |
| H                                             | -1.38817900                 | 0.62439200                                                                          | -1.80726500 |
| C                                             | -3.62221800                 | 0.37116700                                                                          | -0.44689800 |
| H                                             | -3.39366200                 | 1.38327700                                                                          | -0.09394200 |
| H                                             | -3.90527900                 | 0.46054100                                                                          | -1.50059600 |
| H                                             | -4.48775400                 | 0.00463400                                                                          | 0.10740400  |

**A new, comprehensive insight on the competition between (4+2) and (2+4) cycloaddition schemes  
and molecular mechanism of Diels-Alder reaction of 2-nitrofurane with isoprene**

**Table S27.** Thermochemistry and cartesian coordinates of **PR** of product **(10)** (path H)  
( $\omega$ B97XD/6-311+G(d), in benzene solution (PCM)).

| Zero-point correction =                       | 0.193838 (Hartree/Particle) | 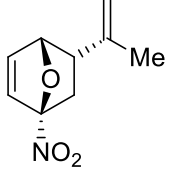 | <b>10_PR</b> |
|-----------------------------------------------|-----------------------------|-------------------------------------------------------------------------------------|--------------|
| Thermal correction to Energy =                | 0.205065 (Hartree/Particle) |                                                                                     |              |
| Thermal correction to Enthalpy =              | 0.206009 (Hartree/Particle) |                                                                                     |              |
| Thermal correction to Gibbs Free Energy =     | 0.155787 (Hartree/Particle) |                                                                                     |              |
| Sum of electronic and zero-point Energies =   | -629.602 (Hartree/Particle) |                                                                                     |              |
| Sum of electronic and thermal Energies =      | -629.591 (Hartree/Particle) |                                                                                     |              |
| Sum of electronic and thermal Enthalpies =    | -629.59 (Hartree/Particle)  |                                                                                     |              |
| Sum of electronic and thermal Free Energies = | -629.64 (Hartree/Particle)  |                                                                                     |              |
| Center                                        | Coordinates (Angstroms)     |                                                                                     |              |
|                                               | X                           | Y                                                                                   | Z            |
| C                                             | -1.092175000                | -0.067813000                                                                        | 0.071613000  |
| C                                             | 0.594231000                 | -1.299481000                                                                        | 0.016723000  |
| C                                             | -0.124563000                | 0.878226000                                                                         | -0.691338000 |
| H                                             | -0.513984000                | 1.095899000                                                                         | -1.686641000 |
| H                                             | 0.010654000                 | 1.813139000                                                                         | -0.153469000 |
| C                                             | 1.124027000                 | -0.035434000                                                                        | -0.758512000 |
| H                                             | 1.088397000                 | -2.238626000                                                                        | -0.214461000 |
| O                                             | -0.766516000                | -1.330548000                                                                        | -0.435170000 |
| N                                             | -2.532297000                | 0.262571000                                                                         | -0.142088000 |
| O                                             | -3.205297000                | -0.467978000                                                                        | -0.827207000 |
| O                                             | -2.910309000                | 1.289025000                                                                         | 0.390424000  |
| C                                             | 2.450067000                 | 0.481325000                                                                         | -0.258800000 |
| C                                             | 2.668058000                 | 1.725824000                                                                         | 0.157997000  |
| H                                             | 3.654228000                 | 2.036053000                                                                         | 0.489881000  |
| H                                             | 1.896789000                 | 2.486765000                                                                         | 0.182959000  |
| C                                             | -0.643136000                | -0.135466000                                                                        | 1.518573000  |
| C                                             | 0.433217000                 | -0.912768000                                                                        | 1.474968000  |
| H                                             | -1.059329000                | 0.447321000                                                                         | 2.327295000  |
| H                                             | 1.129305000                 | -1.137989000                                                                        | 2.270937000  |
| H                                             | 1.261798000                 | -0.360715000                                                                        | -1.794849000 |
| C                                             | 3.555526000                 | -0.542095000                                                                        | -0.289780000 |
| H                                             | 3.359592000                 | -1.362227000                                                                        | 0.410055000  |
| H                                             | 3.645119000                 | -0.991952000                                                                        | -1.284305000 |
| H                                             | 4.518971000                 | -0.103563000                                                                        | -0.025834000 |

**A new, comprehensive insight on the competition between (4+2) and (2+4) cycloaddition schemes  
and molecular mechanism of Diels-Alder reaction of 2-nitrofurane with isoprene**

**Table S28.** Thermochemistry and cartesian coordinates of MC of product (**11**) (path I)  
( $\omega$ B97XD/6-311+G(d), in benzene solution (PCM)).

| Zero-point correction =                       | 0.189078 (Hartree/Particle) | 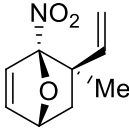 | <b>11_MC</b> |
|-----------------------------------------------|-----------------------------|-------------------------------------------------------------------------------------|--------------|
| Thermal correction to Energy =                | 0.202629 (Hartree/Particle) |                                                                                     |              |
| Thermal correction to Enthalpy =              | 0.203573 (Hartree/Particle) |                                                                                     |              |
| Thermal correction to Gibbs Free Energy =     | 0.14705 (Hartree/Particle)  |                                                                                     |              |
| Sum of electronic and zero-point Energies =   | -629.594 (Hartree/Particle) |                                                                                     |              |
| Sum of electronic and thermal Energies =      | -629.58 (Hartree/Particle)  |                                                                                     |              |
| Sum of electronic and thermal Enthalpies =    | -629.579 (Hartree/Particle) |                                                                                     |              |
| Sum of electronic and thermal Free Energies = | -629.636 (Hartree/Particle) |                                                                                     |              |
| Center                                        | Coordinates (Angstroms)     |                                                                                     |              |
|                                               | X                           | Y                                                                                   | Z            |
| C                                             | -1.20843300                 | 0.46857900                                                                          | 0.12850000   |
| C                                             | -2.09303000                 | -1.26729000                                                                         | -0.76372200  |
| H                                             | -2.40809700                 | -1.85092600                                                                         | -1.61312400  |
| O                                             | -1.53520500                 | -0.07696000                                                                         | -1.05110500  |
| N                                             | -0.59477800                 | 1.75589000                                                                          | 0.10615800   |
| O                                             | -0.48276700                 | 2.32294500                                                                          | -0.96202200  |
| O                                             | -0.22172700                 | 2.19413800                                                                          | 1.18283800   |
| C                                             | 1.07455600                  | -2.23453300                                                                         | -0.75896100  |
| H                                             | 0.73367400                  | -3.12753900                                                                         | -0.24471700  |
| H                                             | 0.94848000                  | -2.21169000                                                                         | -1.83769500  |
| C                                             | -2.14002700                 | -1.47365400                                                                         | 0.58073800   |
| C                                             | -1.55335600                 | -0.32491100                                                                         | 1.17537600   |
| H                                             | -1.40283900                 | -0.10780400                                                                         | 2.22022000   |
| H                                             | -2.53836600                 | -2.34110100                                                                         | 1.08313700   |
| C                                             | 2.07322600                  | -0.02195900                                                                         | -0.84222400  |
| H                                             | 1.89612500                  | -0.04221000                                                                         | -1.91601400  |
| C                                             | 2.64643900                  | 1.05560900                                                                          | -0.30593100  |
| H                                             | 2.84259700                  | 1.14355700                                                                          | 0.75797900   |
| H                                             | 2.93019500                  | 1.90162900                                                                          | -0.92197700  |
| C                                             | 1.62939500                  | -1.21131200                                                                         | -0.10063000  |
| C                                             | 1.81627300                  | -1.23533200                                                                         | 1.39120400   |
| H                                             | 2.87807400                  | -1.19545200                                                                         | 1.65431000   |
| H                                             | 1.33898300                  | -0.37081100                                                                         | 1.86296300   |
| H                                             | 1.39196000                  | -2.14105600                                                                         | 1.82801000   |

**A new, comprehensive insight on the competition between (4+2) and (2+4) cycloaddition schemes  
and molecular mechanism of Diels-Alder reaction of 2-nitrofurane with isoprene**

**Table S29.** Thermochemistry and cartesian coordinates of **TS** of product (**11**) (path I)  
( $\omega$ B97XD/6-311+G(d), in benzene solution (PCM)).

| Zero-point correction =                       | 0.189685 (Hartree/Particle) | 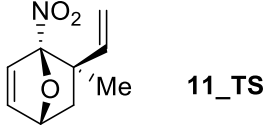 |              |
|-----------------------------------------------|-----------------------------|-------------------------------------------------------------------------------------|--------------|
| Thermal correction to Energy =                | 0.20142 (Hartree/Particle)  |                                                                                     |              |
| Thermal correction to Enthalpy =              | 0.202364 (Hartree/Particle) |                                                                                     |              |
| Thermal correction to Gibbs Free Energy =     | 0.152297 (Hartree/Particle) |                                                                                     |              |
| Sum of electronic and zero-point Energies =   | -629.554 (Hartree/Particle) |                                                                                     |              |
| Sum of electronic and thermal Energies =      | -629.542 (Hartree/Particle) |                                                                                     |              |
| Sum of electronic and thermal Enthalpies =    | -629.541 (Hartree/Particle) |                                                                                     |              |
| Sum of electronic and thermal Free Energies = | -629.592 (Hartree/Particle) |                                                                                     |              |
| Center                                        | Coordinates (Angstroms)     |                                                                                     |              |
|                                               | X                           | Y                                                                                   | Z            |
| C                                             | -0.293567000                | 1.001225000                                                                         | 0.043729000  |
| C                                             | -2.040871000                | 0.173373000                                                                         | -0.827860000 |
| H                                             | -2.730323000                | 0.071232000                                                                         | -1.654796000 |
| O                                             | -0.882105000                | 0.830228000                                                                         | -1.154091000 |
| N                                             | 1.041079000                 | 1.453118000                                                                         | 0.071057000  |
| O                                             | 1.613839000                 | 1.657136000                                                                         | -0.986367000 |
| O                                             | 1.565177000                 | 1.534258000                                                                         | 1.179931000  |
| C                                             | -1.290098000                | -1.609961000                                                                        | -0.641617000 |
| H                                             | -2.098203000                | -2.114204000                                                                        | -0.120590000 |
| H                                             | -1.249527000                | -1.840977000                                                                        | -1.703036000 |
| C                                             | -2.392573000                | 0.546348000                                                                         | 0.508171000  |
| C                                             | -1.242449000                | 1.028253000                                                                         | 1.075030000  |
| H                                             | -1.045244000                | 1.297297000                                                                         | 2.100498000  |
| H                                             | -3.332529000                | 0.327425000                                                                         | 0.992182000  |
| C                                             | 1.166192000                 | -1.417847000                                                                        | -0.759364000 |
| H                                             | 1.034137000                 | -1.246555000                                                                        | -1.825336000 |
| C                                             | 2.410143000                 | -1.525811000                                                                        | -0.277950000 |
| H                                             | 2.616476000                 | -1.698778000                                                                        | 0.773209000  |
| H                                             | 3.267019000                 | -1.452398000                                                                        | -0.937592000 |
| C                                             | -0.056529000                | -1.487233000                                                                        | 0.026371000  |
| C                                             | 0.027506000                 | -1.744603000                                                                        | 1.503053000  |
| H                                             | 0.352800000                 | -2.774427000                                                                        | 1.690425000  |
| H                                             | 0.742399000                 | -1.079657000                                                                        | 1.995308000  |
| H                                             | -0.946368000                | -1.616225000                                                                        | 1.979170000  |

**A new, comprehensive insight on the competition between (4+2) and (2+4) cycloaddition schemes  
and molecular mechanism of Diels-Alder reaction of 2-nitrofurane with isoprene**

**Table S30.** Thermochemistry and cartesian coordinates of **PR** of product (**11**) (path I)  
( $\omega$ B97XD/6-311+G(d), in benzene solution (PCM)).

| Zero-point correction =                       | 0.193866 (Hartree/Particle) | 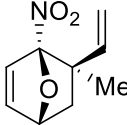 | <b>11_PR</b> |
|-----------------------------------------------|-----------------------------|-------------------------------------------------------------------------------------|--------------|
| Thermal correction to Energy =                | 0.204802 (Hartree/Particle) |                                                                                     |              |
| Thermal correction to Enthalpy =              | 0.205747 (Hartree/Particle) |                                                                                     |              |
| Thermal correction to Gibbs Free Energy =     | 0.157541 (Hartree/Particle) |                                                                                     |              |
| Sum of electronic and zero-point Energies =   | -629.601 (Hartree/Particle) |                                                                                     |              |
| Sum of electronic and thermal Energies =      | -629.59 (Hartree/Particle)  |                                                                                     |              |
| Sum of electronic and thermal Enthalpies =    | -629.589 (Hartree/Particle) |                                                                                     |              |
| Sum of electronic and thermal Free Energies = | -629.637 (Hartree/Particle) |                                                                                     |              |
| Center                                        | Coordinates (Angstroms)     |                                                                                     |              |
|                                               | X                           | Y                                                                                   | Z            |
| C                                             | 0.33767700                  | -0.54484400                                                                         | -0.00038800  |
| C                                             | 1.94959900                  | 0.50027900                                                                          | -0.83089500  |
| H                                             | 2.64752000                  | 0.69632800                                                                          | -1.63977300  |
| O                                             | 0.97592200                  | -0.47501400                                                                         | -1.24174700  |
| N                                             | -0.73980000                 | -1.57621400                                                                         | 0.00707100   |
| O                                             | -1.09817400                 | -2.05398800                                                                         | -1.04143000  |
| O                                             | -1.20541500                 | -1.83274200                                                                         | 1.10182200   |
| C                                             | 1.02831300                  | 1.68049600                                                                          | -0.41369200  |
| H                                             | 1.50129700                  | 2.34441000                                                                          | 0.31130100   |
| H                                             | 0.74901300                  | 2.26788300                                                                          | -1.28903300  |
| C                                             | 2.49240400                  | -0.12733200                                                                         | 0.44055400   |
| C                                             | 1.47271600                  | -0.79166900                                                                         | 0.97230000   |
| H                                             | 1.38094900                  | -1.29855100                                                                         | 1.92134200   |
| H                                             | 3.47614300                  | 0.04171200                                                                          | 0.85704400   |
| C                                             | -1.40633000                 | 1.11222500                                                                          | -0.72389900  |
| H                                             | -1.21771500                 | 0.87797600                                                                          | -1.76928000  |
| C                                             | -2.62372200                 | 1.49531000                                                                          | -0.35872400  |
| H                                             | -2.88325500                 | 1.73688900                                                                          | 0.66678900   |
| H                                             | -3.41797900                 | 1.58074000                                                                          | -1.09268500  |
| C                                             | -0.21287900                 | 0.93999900                                                                          | 0.18451200   |
| C                                             | -0.49518800                 | 1.30945800                                                                          | 1.63434600   |
| H                                             | -0.81448800                 | 2.35248000                                                                          | 1.69905600   |
| H                                             | -1.27881700                 | 0.68340900                                                                          | 2.06587200   |
| H                                             | 0.40172600                  | 1.20064200                                                                          | 2.24603900   |

**A new, comprehensive insight on the competition between (4+2) and (2+4) cycloaddition schemes  
and molecular mechanism of Diels-Alder reaction of 2-nitrofurane with isoprene**

**Table S31.** Thermochemistry and cartesian coordinates of **MC** of product (**12**) (path J)  
( $\omega$ B97XD/6-311+G(d), in benzene solution (PCM)).

| Zero-point correction =                       | 0.189135 (Hartree/Particle) | 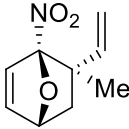 | <b>12_MC</b> |
|-----------------------------------------------|-----------------------------|-------------------------------------------------------------------------------------|--------------|
| Thermal correction to Energy =                | 0.202649 (Hartree/Particle) |                                                                                     |              |
| Thermal correction to Enthalpy =              | 0.203593 (Hartree/Particle) |                                                                                     |              |
| Thermal correction to Gibbs Free Energy =     | 0.147488 (Hartree/Particle) |                                                                                     |              |
| Sum of electronic and zero-point Energies =   | -629.594 (Hartree/Particle) |                                                                                     |              |
| Sum of electronic and thermal Energies =      | -629.58 (Hartree/Particle)  |                                                                                     |              |
| Sum of electronic and thermal Enthalpies =    | -629.579 (Hartree/Particle) |                                                                                     |              |
| Sum of electronic and thermal Free Energies = | -629.636 (Hartree/Particle) |                                                                                     |              |
| Center                                        | Coordinates (Angstroms)     |                                                                                     |              |
|                                               | X                           | Y                                                                                   | Z            |
| C                                             | -1.282614000                | 0.336400000                                                                         | -0.031002000 |
| C                                             | -1.754789000                | -1.685656000                                                                        | -0.561673000 |
| C                                             | 1.799679000                 | -0.998048000                                                                        | 0.082161000  |
| H                                             | -1.806332000                | -2.504130000                                                                        | -1.260793000 |
| O                                             | -1.264761000                | -0.532558000                                                                        | -1.052012000 |
| N                                             | -0.797802000                | 1.652528000                                                                         | -0.283288000 |
| O                                             | -0.339651000                | 1.897268000                                                                         | -1.383827000 |
| O                                             | -0.871822000                | 2.443905000                                                                         | 0.640758000  |
| C                                             | 1.374837000                 | -2.213164000                                                                        | 0.444292000  |
| H                                             | 1.105212000                 | -2.437322000                                                                        | 1.472324000  |
| H                                             | 1.284376000                 | -3.023909000                                                                        | -0.272151000 |
| C                                             | 1.908694000                 | 0.064276000                                                                         | 1.093422000  |
| H                                             | 1.631931000                 | -0.221147000                                                                        | 2.107209000  |
| C                                             | 2.303397000                 | 1.317036000                                                                         | 0.863803000  |
| H                                             | 2.582674000                 | 1.667046000                                                                         | -0.125104000 |
| H                                             | 2.347003000                 | 2.045383000                                                                         | 1.665959000  |
| C                                             | 2.166041000                 | -0.675627000                                                                        | -1.339781000 |
| H                                             | 3.207436000                 | -0.346592000                                                                        | -1.412085000 |
| H                                             | 2.038728000                 | -1.545570000                                                                        | -1.986266000 |
| H                                             | 1.543309000                 | 0.133508000                                                                         | -1.732361000 |
| C                                             | -2.091749000                | -1.555454000                                                                        | 0.750465000  |
| C                                             | -1.779905000                | -0.215893000                                                                        | 1.105653000  |
| H                                             | -1.896289000                | 0.276126000                                                                         | 2.057470000  |
| H                                             | -2.505110000                | -2.323221000                                                                        | 1.385411000  |

**A new, comprehensive insight on the competition between (4+2) and (2+4) cycloaddition schemes  
and molecular mechanism of Diels-Alder reaction of 2-nitrofurane with isoprene**

**Table S32.** Thermochemistry and cartesian coordinates of **TS** of product (**12**) (path J)  
( $\omega$ B97XD/6-311+G(d), in benzene solution (PCM)).

| Zero-point correction =                       | 0.189986 (Hartree/Particle) | 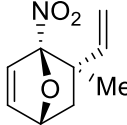 | <b>12_TS</b> |
|-----------------------------------------------|-----------------------------|-------------------------------------------------------------------------------------|--------------|
| Thermal correction to Energy =                | 0.201681 (Hartree/Particle) |                                                                                     |              |
| Thermal correction to Enthalpy =              | 0.202626 (Hartree/Particle) |                                                                                     |              |
| Thermal correction to Gibbs Free Energy =     | 0.152415 (Hartree/Particle) |                                                                                     |              |
| Sum of electronic and zero-point Energies =   | -629.552 (Hartree/Particle) |                                                                                     |              |
| Sum of electronic and thermal Energies =      | -629.54 (Hartree/Particle)  |                                                                                     |              |
| Sum of electronic and thermal Enthalpies =    | -629.539 (Hartree/Particle) |                                                                                     |              |
| Sum of electronic and thermal Free Energies = | -629.59 (Hartree/Particle)  |                                                                                     |              |
| Center                                        | Coordinates (Angstroms)     |                                                                                     |              |
|                                               | X                           | Y                                                                                   | Z            |
| C                                             | 0.31530800                  | -0.96239000                                                                         | 0.24788800   |
| C                                             | 2.18190700                  | -0.11671900                                                                         | -0.29797800  |
| C                                             | -0.08972500                 | 1.37466100                                                                          | -0.52696300  |
| H                                             | 3.07485800                  | -0.10575600                                                                         | -0.90777400  |
| O                                             | 1.21781600                  | -0.98187300                                                                         | -0.74984200  |
| N                                             | -0.92735800                 | -1.59077800                                                                         | 0.03330700   |
| O                                             | -1.15424300                 | -2.08933700                                                                         | -1.06052300  |
| O                                             | -1.73211900                 | -1.53510800                                                                         | 0.95949400   |
| C                                             | 1.28986100                  | 1.55259800                                                                          | -0.74723900  |
| H                                             | 1.82158000                  | 2.24844200                                                                          | -0.10556700  |
| H                                             | 1.61050700                  | 1.59199600                                                                          | -1.78511000  |
| C                                             | -0.68485500                 | 1.87158600                                                                          | 0.70593000   |
| H                                             | 0.01940200                  | 2.16834200                                                                          | 1.48103800   |
| C                                             | -1.99422700                 | 1.98637800                                                                          | 0.95441700   |
| H                                             | -2.75279300                 | 1.72509900                                                                          | 0.22454000   |
| H                                             | -2.34738800                 | 2.36097900                                                                          | 1.90865900   |
| C                                             | -0.97055700                 | 0.99631700                                                                          | -1.68345700  |
| H                                             | -1.31080700                 | 1.90205400                                                                          | -2.19863700  |
| H                                             | -0.42751000                 | 0.38573100                                                                          | -2.40651800  |
| H                                             | -1.86331700                 | 0.44383500                                                                          | -1.38384100  |
| C                                             | 2.14893200                  | -0.13500400                                                                         | 1.13238700   |
| C                                             | 0.91769200                  | -0.62806700                                                                         | 1.47011600   |
| H                                             | 0.44312500                  | -0.68634600                                                                         | 2.43653600   |
| H                                             | 2.88620100                  | 0.31544700                                                                          | 1.77988500   |

**A new, comprehensive insight on the competition between (4+2) and (2+4) cycloaddition schemes  
and molecular mechanism of Diels-Alder reaction of 2-nitrofurane with isoprene**

**Table S33.** Thermochemistry and cartesian coordinates of **PR** of product (**12**) (path J)  
( $\omega$ B97XD/6-311+G(d), in benzene solution (PCM)).

| Zero-point correction =                       | 0.193844 (Hartree/Particle) | 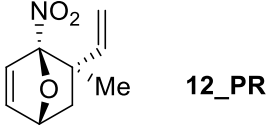 |              |
|-----------------------------------------------|-----------------------------|-------------------------------------------------------------------------------------|--------------|
| Thermal correction to Energy =                | 0.204769 (Hartree/Particle) |                                                                                     |              |
| Thermal correction to Enthalpy =              | 0.205713 (Hartree/Particle) |                                                                                     |              |
| Thermal correction to Gibbs Free Energy =     | 0.157483 (Hartree/Particle) |                                                                                     |              |
| Sum of electronic and zero-point Energies =   | -629.6 (Hartree/Particle)   |                                                                                     |              |
| Sum of electronic and thermal Energies =      | -629.589 (Hartree/Particle) |                                                                                     |              |
| Sum of electronic and thermal Enthalpies =    | -629.588 (Hartree/Particle) |                                                                                     |              |
| Sum of electronic and thermal Free Energies = | -629.636 (Hartree/Particle) |                                                                                     |              |
| Coordinates (Angstroms)                       |                             |                                                                                     |              |
| Center                                        | X                           | Y                                                                                   | Z            |
| C                                             | -0.436850000                | -0.453038000                                                                        | -0.142025000 |
| C                                             | -1.953621000                | 0.876216000                                                                         | 0.414954000  |
| C                                             | 0.472909000                 | 0.742123000                                                                         | 0.387661000  |
| H                                             | -2.857067000                | 1.120664000                                                                         | 0.966306000  |
| O                                             | -1.499568000                | -0.441722000                                                                        | 0.765257000  |
| N                                             | 0.268402000                 | -1.767166000                                                                        | -0.140963000 |
| O                                             | 0.052892000                 | -2.543190000                                                                        | 0.759665000  |
| O                                             | 1.055171000                 | -1.937021000                                                                        | -1.052495000 |
| C                                             | -0.693846000                | 1.723121000                                                                         | 0.744347000  |
| H                                             | -0.656730000                | 2.650798000                                                                         | 0.171868000  |
| H                                             | -0.667856000                | 1.971358000                                                                         | 1.806149000  |
| C                                             | 1.375685000                 | 1.302066000                                                                         | -0.678567000 |
| H                                             | 0.867708000                 | 1.645723000                                                                         | -1.577494000 |
| C                                             | 2.694741000                 | 1.433450000                                                                         | -0.606616000 |
| H                                             | 3.272252000                 | 1.121081000                                                                         | 0.257069000  |
| H                                             | 3.252532000                 | 1.865870000                                                                         | -1.430482000 |
| C                                             | 1.218600000                 | 0.301509000                                                                         | 1.646047000  |
| H                                             | 1.705604000                 | 1.160401000                                                                         | 2.113373000  |
| H                                             | 0.526786000                 | -0.131305000                                                                        | 2.369692000  |
| H                                             | 1.989963000                 | -0.441058000                                                                        | 1.425819000  |
| C                                             | -2.048905000                | 0.773031000                                                                         | -1.097590000 |
| C                                             | -1.086798000                | -0.068881000                                                                        | -1.456553000 |
| H                                             | -0.730500000                | -0.355450000                                                                        | -2.434807000 |
| H                                             | -2.700964000                | 1.359957000                                                                         | -1.730117000 |

**A new, comprehensive insight on the competition between (4+2) and (2+4) cycloaddition schemes  
and molecular mechanism of Diels-Alder reaction of 2-nitrofurane with isoprene**

**Table S34.** Thermochemistry and cartesian coordinates of **MC** of product (**13**) (path K)  
( $\omega$ B97XD/6-311+G(d), in benzene solution (PCM)).

| Zero-point correction =                       | 0.188501 (Hartree/Particle) | 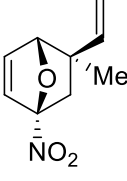 | <b>13_MC</b> |
|-----------------------------------------------|-----------------------------|-------------------------------------------------------------------------------------|--------------|
| Thermal correction to Energy =                | 0.201474 (Hartree/Particle) |                                                                                     |              |
| Thermal correction to Enthalpy =              | 0.202418 (Hartree/Particle) |                                                                                     |              |
| Thermal correction to Gibbs Free Energy =     | 0.147182 (Hartree/Particle) |                                                                                     |              |
| Sum of electronic and zero-point Energies =   | -629.589 (Hartree/Particle) |                                                                                     |              |
| Sum of electronic and thermal Energies =      | -629.576 (Hartree/Particle) |                                                                                     |              |
| Sum of electronic and thermal Enthalpies =    | -629.575 (Hartree/Particle) |                                                                                     |              |
| Sum of electronic and thermal Free Energies = | -629.63 (Hartree/Particle)  |                                                                                     |              |
| Center                                        | Coordinates (Angstroms)     |                                                                                     |              |
|                                               | X                           | Y                                                                                   | Z            |
| C                                             | 1.32832900                  | 0.41217700                                                                          | 0.00082700   |
| C                                             | 0.29108700                  | 2.23497700                                                                          | -0.44389600  |
| H                                             | -0.22395900                 | 2.90307200                                                                          | -1.11422700  |
| O                                             | 0.74109000                  | 1.09224400                                                                          | -0.99418900  |
| N                                             | 1.87319600                  | -0.86626700                                                                         | -0.31504900  |
| O                                             | 1.82618400                  | -1.24473300                                                                         | -1.46887200  |
| O                                             | 2.34893400                  | -1.49678400                                                                         | 0.61610900   |
| C                                             | -1.81212000                 | -0.92912400                                                                         | 0.43936300   |
| C                                             | 0.59417900                  | 2.29199200                                                                          | 0.88074200   |
| C                                             | 1.28088200                  | 1.08242700                                                                          | 1.17988000   |
| H                                             | 1.67718400                  | 0.74542600                                                                          | 2.12380900   |
| H                                             | 0.35359000                  | 3.09412700                                                                          | 1.56057800   |
| C                                             | -1.65137200                 | -0.70429500                                                                         | 1.91931000   |
| H                                             | -1.35533000                 | 0.32775200                                                                          | 2.13115700   |
| H                                             | -2.60025700                 | -0.87621500                                                                         | 2.43932500   |
| H                                             | -0.90277500                 | -1.37242900                                                                         | 2.34938400   |
| C                                             | -1.18733400                 | -1.91724000                                                                         | -0.20469000  |
| H                                             | -0.49843300                 | -2.58123600                                                                         | 0.30935500   |
| H                                             | -1.34967500                 | -2.10297700                                                                         | -1.26117500  |
| C                                             | -2.73677200                 | -0.00608700                                                                         | -0.25194000  |
| C                                             | -2.58981900                 | 0.45013100                                                                          | -1.49443300  |
| H                                             | -3.32315200                 | 1.11487500                                                                          | -1.93968100  |
| H                                             | -1.73131800                 | 0.18141200                                                                          | -2.10299100  |
| H                                             | -3.59026500                 | 0.33450300                                                                          | 0.33444500   |

**A new, comprehensive insight on the competition between (4+2) and (2+4) cycloaddition schemes  
and molecular mechanism of Diels-Alder reaction of 2-nitrofurane with isoprene**

**Table S35.** Thermochemistry and cartesian coordinates of **TS** of product (**13**) (path K)  
( $\omega$ B97XD/6-311+G(d), in benzene solution (PCM)).

| Zero-point correction =                       | 0.189173 (Hartree/Particle) | 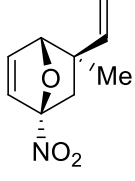 | <b>13_TS</b> |
|-----------------------------------------------|-----------------------------|-------------------------------------------------------------------------------------|--------------|
| Thermal correction to Energy =                | 0.201103 (Hartree/Particle) |                                                                                     |              |
| Thermal correction to Enthalpy =              | 0.202048 (Hartree/Particle) |                                                                                     |              |
| Thermal correction to Gibbs Free Energy =     | 0.151139 (Hartree/Particle) |                                                                                     |              |
| Sum of electronic and zero-point Energies =   | -629.545 (Hartree/Particle) |                                                                                     |              |
| Sum of electronic and thermal Energies =      | -629.533 (Hartree/Particle) |                                                                                     |              |
| Sum of electronic and thermal Enthalpies =    | -629.532 (Hartree/Particle) |                                                                                     |              |
| Sum of electronic and thermal Free Energies = | -629.583 (Hartree/Particle) |                                                                                     |              |
| Center                                        | Coordinates (Angstroms)     |                                                                                     |              |
|                                               | X                           | Y                                                                                   | Z            |
| C                                             | 1.004061000                 | 0.295411000                                                                         | -0.172402000 |
| C                                             | -0.674546000                | 0.666522000                                                                         | -1.394816000 |
| H                                             | -1.419552000                | 0.398615000                                                                         | -2.127887000 |
| O                                             | 0.303596000                 | -0.249512000                                                                        | -1.194027000 |
| N                                             | 2.215225000                 | -0.421439000                                                                        | 0.197944000  |
| O                                             | 2.417625000                 | -1.509317000                                                                        | -0.296420000 |
| O                                             | 2.917082000                 | 0.120802000                                                                         | 1.032221000  |
| C                                             | -1.584400000                | 0.011711000                                                                         | 0.629351000  |
| C                                             | -0.212582000                | 1.932287000                                                                         | -0.991661000 |
| C                                             | 0.910546000                 | 1.710195000                                                                         | -0.234704000 |
| H                                             | 1.499569000                 | 2.404238000                                                                         | 0.343103000  |
| H                                             | -0.718319000                | 2.870040000                                                                         | -1.166197000 |
| C                                             | -2.403429000                | 1.211015000                                                                         | 1.050473000  |
| H                                             | -3.082838000                | 1.540580000                                                                         | 0.259423000  |
| H                                             | -3.014794000                | 0.967861000                                                                         | 1.927115000  |
| H                                             | -1.763747000                | 2.053716000                                                                         | 1.321595000  |
| C                                             | -0.345617000                | -0.207026000                                                                        | 1.248885000  |
| H                                             | -0.033649000                | 0.461791000                                                                         | 2.043759000  |
| H                                             | -0.002190000                | -1.229153000                                                                        | 1.379918000  |
| C                                             | -2.344970000                | -1.107297000                                                                        | 0.036815000  |
| C                                             | -1.893892000                | -2.321216000                                                                        | -0.283813000 |
| H                                             | -2.555972000                | -3.058723000                                                                        | -0.724125000 |
| H                                             | -0.861355000                | -2.622701000                                                                        | -0.137043000 |
| H                                             | -3.391166000                | -0.881595000                                                                        | -0.168228000 |

**A new, comprehensive insight on the competition between (4+2) and (2+4) cycloaddition schemes  
and molecular mechanism of Diels-Alder reaction of 2-nitrofurane with isoprene**

**Table S36.** Thermochemistry and cartesian coordinates of **PR** of product (**13**) (path K)  
( $\omega$ B97XD/6-311+G(d), in benzene solution (PCM)).

| Zero-point correction =                       | 0.193296 (Hartree/Particle) | 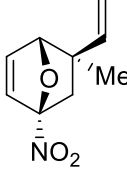 | <b>13_PR</b> |
|-----------------------------------------------|-----------------------------|-------------------------------------------------------------------------------------|--------------|
| Thermal correction to Energy =                | 0.204501 (Hartree/Particle) |                                                                                     |              |
| Thermal correction to Enthalpy =              | 0.205446 (Hartree/Particle) |                                                                                     |              |
| Thermal correction to Gibbs Free Energy =     | 0.155937 (Hartree/Particle) |                                                                                     |              |
| Sum of electronic and zero-point Energies =   | -629.598 (Hartree/Particle) |                                                                                     |              |
| Sum of electronic and thermal Energies =      | -629.587 (Hartree/Particle) |                                                                                     |              |
| Sum of electronic and thermal Enthalpies =    | -629.586 (Hartree/Particle) |                                                                                     |              |
| Sum of electronic and thermal Free Energies = | -629.635 (Hartree/Particle) |                                                                                     |              |
| Center                                        | Coordinates (Angstroms)     |                                                                                     |              |
|                                               | X                           | Y                                                                                   | Z            |
| C                                             | -0.87160200                 | -0.21866700                                                                         | -0.03657900  |
| C                                             | 0.89190200                  | -0.61570300                                                                         | -1.08139300  |
| H                                             | 1.55053600                  | -0.49413600                                                                         | -1.93733200  |
| O                                             | -0.25202300                 | 0.24067900                                                                          | -1.20308800  |
| N                                             | -2.20313300                 | 0.42445600                                                                          | 0.17319500   |
| O                                             | -2.50071200                 | 1.38300400                                                                          | -0.49713600  |
| O                                             | -2.88175200                 | -0.06631500                                                                         | 1.05554200   |
| C                                             | 1.48691400                  | -0.11383500                                                                         | 0.29879900   |
| C                                             | 0.23928000                  | -1.97092400                                                                         | -0.87125800  |
| C                                             | -0.88778000                 | -1.72586300                                                                         | -0.21283700  |
| H                                             | -1.60824900                 | -2.39823700                                                                         | 0.22956500   |
| H                                             | 0.67422900                  | -2.92821600                                                                         | -1.12297700  |
| C                                             | 2.37438300                  | -1.15425400                                                                         | 0.98187900   |
| H                                             | 3.21704400                  | -1.43236400                                                                         | 0.34082300   |
| H                                             | 2.78433000                  | -0.75173600                                                                         | 1.91199100   |
| H                                             | 1.81826400                  | -2.06171400                                                                         | 1.22526500   |
| C                                             | 0.15902600                  | 0.14127600                                                                          | 1.06904600   |
| H                                             | 0.04492200                  | -0.49032300                                                                         | 1.94923200   |
| H                                             | 0.04671200                  | 1.18202900                                                                          | 1.37152300   |
| C                                             | 2.29776000                  | 1.13665200                                                                          | 0.02916000   |
| C                                             | 1.85384200                  | 2.38050400                                                                          | -0.10462000  |
| H                                             | 2.53854700                  | 3.18943300                                                                          | -0.33728300  |
| H                                             | 0.80640700                  | 2.64775400                                                                          | -0.00845200  |
| H                                             | 3.36273900                  | 0.95226000                                                                          | -0.11044300  |

**A new, comprehensive insight on the competition between (4+2) and (2+4) cycloaddition schemes  
and molecular mechanism of Diels-Alder reaction of 2-nitrofurane with isoprene**

**Table S37.** Thermochemistry and cartesian coordinates of **MC** of product (**14**) (path L)  
( $\omega$ B97XD/6-311+G(d), in benzene solution (PCM)).

| Zero-point correction =                       | 0.188659 (Hartree/Particle) | 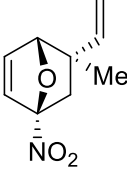 | <b>14_MC</b> |
|-----------------------------------------------|-----------------------------|-------------------------------------------------------------------------------------|--------------|
| Thermal correction to Energy =                | 0.202434 (Hartree/Particle) |                                                                                     |              |
| Thermal correction to Enthalpy =              | 0.203378 (Hartree/Particle) |                                                                                     |              |
| Thermal correction to Gibbs Free Energy =     | 0.145899 (Hartree/Particle) |                                                                                     |              |
| Sum of electronic and zero-point Energies =   | -629.59 (Hartree/Particle)  |                                                                                     |              |
| Sum of electronic and thermal Energies =      | -629.576 (Hartree/Particle) |                                                                                     |              |
| Sum of electronic and thermal Enthalpies =    | -629.575 (Hartree/Particle) |                                                                                     |              |
| Sum of electronic and thermal Free Energies = | -629.632 (Hartree/Particle) |                                                                                     |              |
| Center                                        | Coordinates (Angstroms)     |                                                                                     |              |
|                                               | X                           | Y                                                                                   | Z            |
| C                                             | -1.283207000                | -0.207606000                                                                        | -0.249202000 |
| C                                             | -2.066654000                | 1.725655000                                                                         | 0.250973000  |
| C                                             | 1.869408000                 | -0.844610000                                                                        | 1.280519000  |
| H                                             | 1.409138000                 | -0.995977000                                                                        | 2.251898000  |
| H                                             | 2.277846000                 | -1.721378000                                                                        | 0.788329000  |
| C                                             | 1.933290000                 | 0.365564000                                                                         | 0.721807000  |
| H                                             | -2.546472000                | 2.418415000                                                                         | 0.922845000  |
| O                                             | -1.886844000                | 0.480062000                                                                         | 0.731881000  |
| N                                             | -0.982613000                | -1.578271000                                                                        | 0.004405000  |
| O                                             | -1.273209000                | -2.041092000                                                                        | 1.089714000  |
| O                                             | -0.448122000                | -2.191842000                                                                        | -0.905149000 |
| C                                             | 2.532590000                 | 0.584762000                                                                         | -0.611223000 |
| C                                             | 2.413330000                 | -0.234842000                                                                        | -1.654165000 |
| H                                             | 2.892919000                 | -0.010831000                                                                        | -2.601797000 |
| H                                             | 3.087598000                 | 1.515084000                                                                         | -0.733556000 |
| H                                             | 1.828669000                 | -1.148749000                                                                        | -1.597909000 |
| C                                             | 1.425483000                 | 1.601061000                                                                         | 1.416595000  |
| H                                             | 2.246949000                 | 2.299385000                                                                         | 1.611214000  |
| H                                             | 0.701331000                 | 2.132993000                                                                         | 0.791323000  |
| H                                             | 0.949747000                 | 1.361900000                                                                         | 2.369418000  |
| C                                             | -1.061715000                | 0.553531000                                                                         | -1.350613000 |
| C                                             | -1.583262000                | 1.834041000                                                                         | -1.015885000 |
| H                                             | -0.584604000                | 0.236699000                                                                         | -2.263014000 |
| H                                             | -1.595005000                | 2.717985000                                                                         | -1.633991000 |

**A new, comprehensive insight on the competition between (4+2) and (2+4) cycloaddition schemes  
and molecular mechanism of Diels-Alder reaction of 2-nitrofurane with isoprene**

**Table S38.** Thermochemistry and cartesian coordinates of **TS** of product **(14)** (path L)  
( $\omega$ B97XD/6-311+G(d), in benzene solution (PCM)).

| Zero-point correction =                       | 0.189160 (Hartree/Particle) | 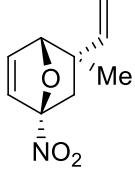 | <b>14_TS</b> |
|-----------------------------------------------|-----------------------------|-------------------------------------------------------------------------------------|--------------|
| Thermal correction to Energy =                | 0.201125 (Hartree/Particle) |                                                                                     |              |
| Thermal correction to Enthalpy =              | 0.202069 (Hartree/Particle) |                                                                                     |              |
| Thermal correction to Gibbs Free Energy =     | 0.150956 (Hartree/Particle) |                                                                                     |              |
| Sum of electronic and zero-point Energies =   | -629.545 (Hartree/Particle) |                                                                                     |              |
| Sum of electronic and thermal Energies =      | -629.533 (Hartree/Particle) |                                                                                     |              |
| Sum of electronic and thermal Enthalpies =    | -629.532 (Hartree/Particle) |                                                                                     |              |
| Sum of electronic and thermal Free Energies = | -629.583 (Hartree/Particle) |                                                                                     |              |
| Center                                        | Coordinates (Angstroms)     |                                                                                     |              |
|                                               | X                           | Y                                                                                   | Z            |
| C                                             | -0.98039200                 | 0.15420700                                                                          | 0.26612500   |
| C                                             | 0.49483100                  | -0.52705100                                                                         | 1.61849300   |
| C                                             | 0.28349400                  | -0.20443100                                                                         | -1.20208100  |
| H                                             | -0.28873900                 | -1.00318200                                                                         | -1.66866600  |
| H                                             | 0.21537600                  | 0.73706900                                                                          | -1.73513900  |
| C                                             | 1.48391700                  | -0.57174100                                                                         | -0.57329900  |
| H                                             | 1.01060600                  | -1.28082800                                                                         | 2.19283200   |
| O                                             | -0.64910900                 | -0.93320600                                                                         | 1.00965300   |
| N                                             | -2.29351700                 | 0.08375600                                                                          | -0.36868500  |
| O                                             | -2.91094800                 | -0.95663900                                                                         | -0.30963500  |
| O                                             | -2.64722900                 | 1.08725600                                                                          | -0.95977500  |
| C                                             | 2.58511500                  | 0.38715800                                                                          | -0.43464500  |
| C                                             | 2.58812400                  | 1.67655300                                                                          | -0.78604200  |
| H                                             | 3.45847000                  | 2.29825000                                                                          | -0.60604200  |
| H                                             | 3.48619800                  | -0.01410600                                                                         | 0.02835200   |
| H                                             | 1.74277900                  | 2.15997000                                                                          | -1.26582200  |
| C                                             | 1.84467100                  | -2.03875900                                                                         | -0.49179400  |
| H                                             | 2.29833500                  | -2.37468300                                                                         | -1.43146800  |
| H                                             | 2.56606100                  | -2.23960700                                                                         | 0.30486300   |
| H                                             | 0.96143700                  | -2.65678400                                                                         | -0.31565700  |
| C                                             | -0.49580900                 | 1.32758500                                                                          | 0.90473500   |
| C                                             | 0.49643800                  | 0.86623500                                                                          | 1.73620300   |
| H                                             | -0.75774700                 | 2.33991400                                                                          | 0.64272300   |
| H                                             | 1.21778600                  | 1.44987400                                                                          | 2.28671300   |

**A new, comprehensive insight on the competition between (4+2) and (2+4) cycloaddition schemes  
and molecular mechanism of Diels-Alder reaction of 2-nitrofurán with isoprene**

**Table S39.** Thermochemistry and cartesian coordinates of **PR** of product (**14**) (path L)  
( $\omega$ B97XD/6-311+G(d), in benzene solution (PCM)).

| Zero-point correction =                       | 0.193283 (Hartree/Particle) | 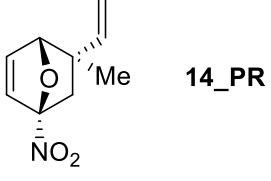 |              |
|-----------------------------------------------|-----------------------------|-------------------------------------------------------------------------------------|--------------|
| Thermal correction to Energy =                | 0.204527 (Hartree/Particle) |                                                                                     |              |
| Thermal correction to Enthalpy =              | 0.205471 (Hartree/Particle) |                                                                                     |              |
| Thermal correction to Gibbs Free Energy =     | 0.155771 (Hartree/Particle) |                                                                                     |              |
| Sum of electronic and zero-point Energies =   | -629.6 (Hartree/Particle)   |                                                                                     |              |
| Sum of electronic and thermal Energies =      | -629.588 (Hartree/Particle) |                                                                                     |              |
| Sum of electronic and thermal Enthalpies =    | -629.587 (Hartree/Particle) |                                                                                     |              |
| Sum of electronic and thermal Free Energies = | -629.637 (Hartree/Particle) |                                                                                     |              |
| Coordinates (Angstroms)                       |                             |                                                                                     |              |
| Center                                        | X                           | Y                                                                                   | Z            |
| C                                             | 0.921510000                 | -0.121840000                                                                        | 0.122999000  |
| C                                             | -0.694479000                | 0.544226000                                                                         | 1.262169000  |
| C                                             | -0.151173000                | -0.035434000                                                                        | -0.997039000 |
| H                                             | 0.153908000                 | 0.685091000                                                                         | -1.757817000 |
| H                                             | -0.301847000                | -1.003111000                                                                        | -1.469768000 |
| C                                             | -1.357725000                | 0.492847000                                                                         | -0.169861000 |
| H                                             | -1.159640000                | 1.235756000                                                                         | 1.960922000  |
| O                                             | 0.630071000                 | 0.983645000                                                                         | 0.929187000  |
| N                                             | 2.320870000                 | -0.074720000                                                                        | -0.396504000 |
| O                                             | 2.975976000                 | 0.924057000                                                                         | -0.224637000 |
| O                                             | 2.683607000                 | -1.071602000                                                                        | -0.992110000 |
| C                                             | -2.601481000                | -0.355613000                                                                        | -0.170151000 |
| C                                             | -2.914357000                | -1.352261000                                                                        | -0.988690000 |
| H                                             | -3.866909000                | -1.864154000                                                                        | -0.900537000 |
| H                                             | -3.333692000                | -0.060283000                                                                        | 0.582849000  |
| H                                             | -2.254740000                | -1.698607000                                                                        | -1.777937000 |
| C                                             | -1.731233000                | 1.920463000                                                                         | -0.593725000 |
| H                                             | -2.069217000                | 1.934540000                                                                         | -1.632798000 |
| H                                             | -2.542688000                | 2.311012000                                                                         | 0.027650000  |
| H                                             | -0.873194000                | 2.589418000                                                                         | -0.498053000 |
| C                                             | 0.590522000                 | -1.307562000                                                                        | 1.009628000  |
| C                                             | -0.443076000                | -0.879293000                                                                        | 1.724817000  |
| H                                             | 1.036171000                 | -2.288325000                                                                        | 0.930287000  |
| H                                             | -1.062517000                | -1.440294000                                                                        | 2.410318000  |
